# Supplementary material for: Tire emissions during the use phase of tires – current and future trends
Source: Royal Society of Chemistry journal article supplement (doi:10.1039/d4va00407h), 2025-01-01
Supplement: d4va00407h2.xlsx [file d4va00407h2.xlsx]

## Sheet: SI.1 Keywords
keyword 1	connector	keyword 2	connector	keyword 3	connector	keyword 4	connector	keyword 5	connector	keyword 6	connector	keyword 7	connector	keyword 8	connector	keyword 9	connector	keyword 10	connector	keyword 11	connector	keyword 12	connector	keyword 13
tire	OR	tyre	OR	tire dust	OR	tyre dust	OR	tire wear	OR	tyre wear	OR	TWP	OR	tire wear particle	OR	tyre wear particle	OR	TRWP	OR	tire and road wear particle	OR	tyre and road wear particle	AND	analysis
tire	OR	tyre	OR	tire dust	OR	tyre dust	OR	tire wear	OR	tyre wear	OR	TWP	OR	tire wear particle	OR	tyre wear particle	OR	TRWP	OR	tire and road wear particle	OR	tyre and road wear particle	AND	quantification
tire	OR	tyre	OR	tire dust	OR	tyre dust	OR	tire wear	OR	tyre wear	OR	TWP	OR	tire wear particle	OR	tyre wear particle	OR	TRWP	OR	tire and road wear particle	OR	tyre and road wear particle	AND	detection
tire	OR	tyre	OR	tire dust	OR	tyre dust	OR	tire wear	OR	tyre wear	OR	TWP	OR	tire wear particle	OR	tyre wear particle	OR	TRWP	OR	tire and road wear particle	OR	tyre and road wear particle	AND	characterization
tire	OR	tyre	OR	tire dust	OR	tyre dust	OR	tire wear	OR	tyre wear	OR	TWP	OR	tire wear particle	OR	tyre wear particle	OR	TRWP	OR	tire and road wear particle	OR	tyre and road wear particle	AND	composition
tire	OR	tyre	OR	tire dust	OR	tyre dust	OR	tire wear	OR	tyre wear	OR	TWP	OR	tire wear particle	OR	tyre wear particle	OR	TRWP	OR	tire and road wear particle	OR	tyre and road wear particle	AND	generation
tire	OR	tyre	OR	tire dust	OR	tyre dust	OR	tire wear	OR	tyre wear	OR	TWP	OR	tire wear particle	OR	tyre wear particle	OR	TRWP	OR	tire and road wear particle	OR	tyre and road wear particle	AND	water
tire	OR	tyre	OR	tire dust	OR	tyre dust	OR	tire wear	OR	tyre wear	OR	TWP	OR	tire wear particle	OR	tyre wear particle	OR	TRWP	OR	tire and road wear particle	OR	tyre and road wear particle	AND	soil
tire	OR	tyre	OR	tire dust	OR	tyre dust	OR	tire wear	OR	tyre wear	OR	TWP	OR	tire wear particle	OR	tyre wear particle	OR	TRWP	OR	tire and road wear particle	OR	tyre and road wear particle	AND	sediment*
tire	OR	tyre	OR	tire dust	OR	tyre dust	OR	tire wear	OR	tyre wear	OR	TWP	OR	tire wear particle	OR	tyre wear particle	OR	TRWP	OR	tire and road wear particle	OR	tyre and road wear particle	AND	suspended matter
tire	OR	tyre	OR	tire dust	OR	tyre dust	OR	tire wear	OR	tyre wear	OR	TWP	OR	tire wear particle	OR	tyre wear particle	OR	TRWP	OR	tire and road wear particle	OR	tyre and road wear particle	AND	dust
tire	OR	tyre	OR	tire dust	OR	tyre dust	OR	tire wear	OR	tyre wear	OR	TWP	OR	tire wear particle	OR	tyre wear particle	OR	TRWP	OR	tire and road wear particle	OR	tyre and road wear particle	AND	air
tire	OR	tyre	OR	tire dust	OR	tyre dust	OR	tire wear	OR	tyre wear	OR	TWP	OR	tire wear particle	OR	tyre wear particle	OR	TRWP	OR	tire and road wear particle	OR	tyre and road wear particle	AND	PM20
tire	OR	tyre	OR	tire dust	OR	tyre dust	OR	tire wear	OR	tyre wear	OR	TWP	OR	tire wear particle	OR	tyre wear particle	OR	TRWP	OR	tire and road wear particle	OR	tyre and road wear particle	AND	PM10
tire	OR	tyre	OR	tire dust	OR	tyre dust	OR	tire wear	OR	tyre wear	OR	TWP	OR	tire wear particle	OR	tyre wear particle	OR	TRWP	OR	tire and road wear particle	OR	tyre and road wear particle	AND	PM2.5
tire	OR	tyre	OR	tire dust	OR	tyre dust	OR	tire wear	OR	tyre wear	OR	TWP	OR	tire wear particle	OR	tyre wear particle	OR	TRWP	OR	tire and road wear particle	OR	tyre and road wear particle	AND	airborne PM
tire	OR	tyre	OR	tire dust	OR	tyre dust	OR	tire wear	OR	tyre wear	OR	TWP	OR	tire wear particle	OR	tyre wear particle	OR	TRWP	OR	tire and road wear particle	OR	tyre and road wear particle	AND	food
tire	OR	tyre	OR	tire dust	OR	tyre dust	OR	tire wear	OR	tyre wear	OR	TWP	OR	tire wear particle	OR	tyre wear particle	OR	TRWP	OR	tire and road wear particle	OR	tyre and road wear particle	AND	consumer product*
tire	OR	tyre	OR	tire dust	OR	tyre dust	OR	tire wear	OR	tyre wear	OR	TWP	OR	tire wear particle	OR	tyre wear particle	OR	TRWP	OR	tire and road wear particle	OR	tyre and road wear particle	AND	marine environmen*
tire	OR	tyre	OR	tire dust	OR	tyre dust	OR	tire wear	OR	tyre wear	OR	TWP	OR	tire wear particle	OR	tyre wear particle	OR	TRWP	OR	tire and road wear particle	OR	tyre and road wear particle	AND	estuar*
tire	OR	tyre	OR	tire dust	OR	tyre dust	OR	tire wear	OR	tyre wear	OR	TWP	OR	tire wear particle	OR	tyre wear particle	OR	TRWP	OR	tire and road wear particle	OR	tyre and road wear particle	AND	ocean*
tire	OR	tyre	OR	tire dust	OR	tyre dust	OR	tire wear	OR	tyre wear	OR	TWP	OR	tire wear particle	OR	tyre wear particle	OR	TRWP	OR	tire and road wear particle	OR	tyre and road wear particle	AND	terrestrial
tire	OR	tyre	OR	tire dust	OR	tyre dust	OR	tire wear	OR	tyre wear	OR	TWP	OR	tire wear particle	OR	tyre wear particle	OR	TRWP	OR	tire and road wear particle	OR	tyre and road wear particle	AND	environment*
tire	OR	tyre	OR	tire dust	OR	tyre dust	OR	tire wear	OR	tyre wear	OR	TWP	OR	tire wear particle	OR	tyre wear particle	OR	TRWP	OR	tire and road wear particle	OR	tyre and road wear particle	AND	degradation
tire	OR	tyre	OR	tire dust	OR	tyre dust	OR	tire wear	OR	tyre wear	OR	TWP	OR	tire wear particle	OR	tyre wear particle	OR	TRWP	OR	tire and road wear particle	OR	tyre and road wear particle	AND	transformation
tire	OR	tyre	OR	tire dust	OR	tyre dust	OR	tire wear	OR	tyre wear	OR	TWP	OR	tire wear particle	OR	tyre wear particle	OR	TRWP	OR	tire and road wear particle	OR	tyre and road wear particle	AND	environmental fate
tire	OR	tyre	OR	tire dust	OR	tyre dust	OR	tire wear	OR	tyre wear	OR	TWP	OR	tire wear particle	OR	tyre wear particle	OR	TRWP	OR	tire and road wear particle	OR	tyre and road wear particle	AND	exposure
tire	OR	tyre	OR	tire dust	OR	tyre dust	OR	tire wear	OR	tyre wear	OR	TWP	OR	tire wear particle	OR	tyre wear particle	OR	TRWP	OR	tire and road wear particle	OR	tyre and road wear particle	AND	toxicit*
tire	OR	tyre	OR	tire dust	OR	tyre dust	OR	tire wear	OR	tyre wear	OR	TWP	OR	tire wear particle	OR	tyre wear particle	OR	TRWP	OR	tire and road wear particle	OR	tyre and road wear particle	AND	end point*
tire	OR	tyre	OR	tire dust	OR	tyre dust	OR	tire wear	OR	tyre wear	OR	TWP	OR	tire wear particle	OR	tyre wear particle	OR	TRWP	OR	tire and road wear particle	OR	tyre and road wear particle	AND	hazard*
tire	OR	tyre	OR	tire dust	OR	tyre dust	OR	tire wear	OR	tyre wear	OR	TWP	OR	tire wear particle	OR	tyre wear particle	OR	TRWP	OR	tire and road wear particle	OR	tyre and road wear particle	AND	in vitro
tire	OR	tyre	OR	tire dust	OR	tyre dust	OR	tire wear	OR	tyre wear	OR	TWP	OR	tire wear particle	OR	tyre wear particle	OR	TRWP	OR	tire and road wear particle	OR	tyre and road wear particle	AND	in vivo
tire	OR	tyre	OR	tire dust	OR	tyre dust	OR	tire wear	OR	tyre wear	OR	TWP	OR	tire wear particle	OR	tyre wear particle	OR	TRWP	OR	tire and road wear particle	OR	tyre and road wear particle	AND	LC50
tire	OR	tyre	OR	tire dust	OR	tyre dust	OR	tire wear	OR	tyre wear	OR	TWP	OR	tire wear particle	OR	tyre wear particle	OR	TRWP	OR	tire and road wear particle	OR	tyre and road wear particle	AND	EC50
tire	OR	tyre	OR	tire dust	OR	tyre dust	OR	tire wear	OR	tyre wear	OR	TWP	OR	tire wear particle	OR	tyre wear particle	OR	TRWP	OR	tire and road wear particle	OR	tyre and road wear particle	AND	LOEC
tire	OR	tyre	OR	tire dust	OR	tyre dust	OR	tire wear	OR	tyre wear	OR	TWP	OR	tire wear particle	OR	tyre wear particle	OR	TRWP	OR	tire and road wear particle	OR	tyre and road wear particle	AND	NOEC
tire	OR	tyre	OR	tire dust	OR	tyre dust	OR	tire wear	OR	tyre wear	OR	TWP	OR	tire wear particle	OR	tyre wear particle	OR	TRWP	OR	tire and road wear particle	OR	tyre and road wear particle	AND	risk assessment
tire	OR	tyre	OR	tire dust	OR	tyre dust	OR	tire wear	OR	tyre wear	OR	TWP	OR	tire wear particle	OR	tyre wear particle	OR	TRWP	OR	tire and road wear particle	OR	tyre and road wear particle	AND	leaching
tire	OR	tyre	OR	tire dust	OR	tyre dust	OR	tire wear	OR	tyre wear	OR	TWP	OR	tire wear particle	OR	tyre wear particle	OR	TRWP	OR	tire and road wear particle	OR	tyre and road wear particle	AND	leachable
tire	OR	tyre	OR	tire dust	OR	tyre dust	OR	tire wear	OR	tyre wear	OR	TWP	OR	tire wear particle	OR	tyre wear particle	OR	TRWP	OR	tire and road wear particle	OR	tyre and road wear particle	AND	non target
Diphenylguanidine	OR	DPG	AND	tire
Diphenylguanidine	OR	DPG	AND	tyre
Diphenylguanidine	OR	DPG	AND	water
Diphenylguanidine	OR	DPG	AND	soil
Diphenylguanidine	OR	DPG	AND	sediment*
Diphenylguanidine	OR	DPG	AND	suspended matter
Diphenylguanidine	OR	DPG	AND	dust
Diphenylguanidine	OR	DPG	AND	air
Diphenylguanidine	OR	DPG	AND	PM20
Diphenylguanidine	OR	DPG	AND	PM10
Diphenylguanidine	OR	DPG	AND	PM2.5
Diphenylguanidine	OR	DPG	AND	airborne PM
Diphenylguanidine	OR	DPG	AND	food
Diphenylguanidine	OR	DPG	AND	consumer product*
Diphenylguanidine	OR	DPG	AND	marine environmen*
Diphenylguanidine	OR	DPG	AND	terrestrial
Diphenylguanidine	OR	DPG	AND	estuar*
Diphenylguanidine	OR	DPG	AND	ocean*
Diphenylguanidine	OR	DPG	AND	environment*	AND	concentrations
Diphenylguanidine	OR	DPG	AND	toxicit*
hexa(methoxymethyl)melamine	OR	HMMM	AND	tire
hexa(methoxymethyl)melamine	OR	HMMM	AND	tyre
hexa(methoxymethyl)melamine	OR	HMMM	AND	water
hexa(methoxymethyl)melamine	OR	HMMM	AND	soil
hexa(methoxymethyl)melamine	OR	HMMM	AND	sediment*
hexa(methoxymethyl)melamine	OR	HMMM	AND	suspended matter
hexa(methoxymethyl)melamine	OR	HMMM	AND	dust
hexa(methoxymethyl)melamine	OR	HMMM	AND	air
hexa(methoxymethyl)melamine	OR	HMMM	AND	PM20
hexa(methoxymethyl)melamine	OR	HMMM	AND	PM10
hexa(methoxymethyl)melamine	OR	HMMM	AND	PM2.5
hexa(methoxymethyl)melamine	OR	HMMM	AND	airborne PM
hexa(methoxymethyl)melamine	OR	HMMM	AND	food
hexa(methoxymethyl)melamine	OR	HMMM	AND	consumer product*
hexa(methoxymethyl)melamine	OR	HMMM	AND	marine environmen*
hexa(methoxymethyl)melamine	OR	HMMM	AND	terrestrial
hexa(methoxymethyl)melamine	OR	HMMM	AND	estuar*
hexa(methoxymethyl)melamine	OR	HMMM	AND	ocean*
hexa(methoxymethyl)melamine	OR	HMMM	AND	environment*	AND	concentrations
hexa(methoxymethyl)melamine	OR	HMMM	AND	toxicit*
Diphenylurea	OR	DPU	AND	tire
Diphenylurea	OR	DPU	AND	tyre
Diphenylurea	OR	DPU	AND	water
Diphenylurea	OR	DPU	AND	soil
Diphenylurea	OR	DPU	AND	sediment*
Diphenylurea	OR	DPU	AND	suspended matter
Diphenylurea	OR	DPU	AND	dust
Diphenylurea	OR	DPU	AND	air
Diphenylurea	OR	DPU	AND	PM20
Diphenylurea	OR	DPU	AND	PM10
Diphenylurea	OR	DPU	AND	PM2.5
Diphenylurea	OR	DPU	AND	airborne PM
Diphenylurea	OR	DPU	AND	food
Diphenylurea	OR	DPU	AND	consumer product*
Diphenylurea	OR	DPU	AND	marine environmen*
Diphenylurea	OR	DPU	AND	terrestrial
Diphenylurea	OR	DPU	AND	estuar*
Diphenylurea	OR	DPU	AND	ocean*
Diphenylurea	OR	DPU	AND	environment*	AND	concentrations
Diphenylurea	OR	DPU	AND	toxicit*
Dicyclohexylurea	OR	DCU	AND	tire
Dicyclohexylurea	OR	DCU	AND	tyre
Dicyclohexylurea	OR	DCU	AND	water
Dicyclohexylurea	OR	DCU	AND	soil
Dicyclohexylurea	OR	DCU	AND	sediment*
Dicyclohexylurea	OR	DCU	AND	suspended matter
Dicyclohexylurea	OR	DCU	AND	dust
Dicyclohexylurea	OR	DCU	AND	air
Dicyclohexylurea	OR	DCU	AND	PM20
Dicyclohexylurea	OR	DCU	AND	PM10
Dicyclohexylurea	OR	DCU	AND	PM2.5
Dicyclohexylurea	OR	DCU	AND	airborne PM
Dicyclohexylurea	OR	DCU	AND	food
Dicyclohexylurea	OR	DCU	AND	consumer product*
Dicyclohexylurea	OR	DCU	AND	marine environmen*
Dicyclohexylurea	OR	DCU	AND	terrestrial
Dicyclohexylurea	OR	DCU	AND	estuar*
Dicyclohexylurea	OR	DCU	AND	ocean*
Dicyclohexylurea	OR	DCU	AND	environment*	AND	concentrations
Dicyclohexylurea	OR	DCU	AND	toxicit*
Benzothiazole	OR	BT	AND	tire
Benzothiazole	OR	BT	AND	tyre
Benzothiazole	OR	BT	AND	water
Benzothiazole	OR	BT	AND	soil
Benzothiazole	OR	BT	AND	sediment*
Benzothiazole	OR	BT	AND	suspended matter
Benzothiazole	OR	BT	AND	dust
Benzothiazole	OR	BT	AND	air
Benzothiazole	OR	BT	AND	PM20
Benzothiazole	OR	BT	AND	PM10
Benzothiazole	OR	BT	AND	PM2.5
Benzothiazole	OR	BT	AND	airborne PM
Benzothiazole	OR	BT	AND	food
Benzothiazole	OR	BT	AND	consumer product*
Benzothiazole	OR	BT	AND	marine environmen*
Benzothiazole	OR	BT	AND	terrestrial
Benzothiazole	OR	BT	AND	estuar*
Benzothiazole	OR	BT	AND	ocean*
Benzothiazole	OR	BT	AND	environment*	AND	concentrations
Benzothiazole	OR	BT	AND	toxicit*
Mercaptobenzothiazole	OR	MBT	AND	tire
Mercaptobenzothiazole	OR	MBT	AND	tyre
Mercaptobenzothiazole	OR	MBT	AND	water
Mercaptobenzothiazole	OR	MBT	AND	soil
Mercaptobenzothiazole	OR	MBT	AND	sediment*
Mercaptobenzothiazole	OR	MBT	AND	suspended matter
Mercaptobenzothiazole	OR	MBT	AND	dust
Mercaptobenzothiazole	OR	MBT	AND	air
Mercaptobenzothiazole	OR	MBT	AND	PM20
Mercaptobenzothiazole	OR	MBT	AND	PM10
Mercaptobenzothiazole	OR	MBT	AND	PM2.5
Mercaptobenzothiazole	OR	MBT	AND	airborne PM
Mercaptobenzothiazole	OR	MBT	AND	food
Mercaptobenzothiazole	OR	MBT	AND	consumer product*
Mercaptobenzothiazole	OR	MBT	AND	marine environmen*
Mercaptobenzothiazole	OR	MBT	AND	terrestrial
Mercaptobenzothiazole	OR	MBT	AND	estuar*
Mercaptobenzothiazole	OR	MBT	AND	ocean*
Mercaptobenzothiazole	OR	MBT	AND	environment*	AND	concentrations
Mercaptobenzothiazole	OR	MBT	AND	toxicit*
Methylthiobenzothiazole	AND	tire
Methylthiobenzothiazole	AND	tyre
Methylthiobenzothiazole	AND	water
Methylthiobenzothiazole	AND	soil
Methylthiobenzothiazole	AND	sediment*
Methylthiobenzothiazole	AND	suspended matter
Methylthiobenzothiazole	AND	dust
Methylthiobenzothiazole	AND	air
Methylthiobenzothiazole	AND	PM20
Methylthiobenzothiazole	AND	PM10
Methylthiobenzothiazole	AND	PM2.5
Methylthiobenzothiazole	AND	airborne PM
Methylthiobenzothiazole	AND	food
Methylthiobenzothiazole	AND	consumer product*
Methylthiobenzothiazole	AND	marine environmen*
Methylthiobenzothiazole	AND	terrestrial
Methylthiobenzothiazole	AND	estuar*
Methylthiobenzothiazole	AND	ocean*
Methylthiobenzothiazole	AND	environment*	AND	concentrations
Methylthiobenzothiazole	AND	toxicit*
Hydroxybenzothiazole	AND	tire
Hydroxybenzothiazole	AND	tyre
Hydroxybenzothiazole	AND	water
Hydroxybenzothiazole	AND	soil
Hydroxybenzothiazole	AND	sediment*
Hydroxybenzothiazole	AND	suspended matter
Hydroxybenzothiazole	AND	dust
Hydroxybenzothiazole	AND	air
Hydroxybenzothiazole	AND	PM20
Hydroxybenzothiazole	AND	PM10
Hydroxybenzothiazole	AND	PM2.5
Hydroxybenzothiazole	AND	airborne PM
Hydroxybenzothiazole	AND	food
Hydroxybenzothiazole	AND	consumer product*
Hydroxybenzothiazole	AND	marine environmen*
Hydroxybenzothiazole	AND	terrestrial
Hydroxybenzothiazole	AND	estuar*
Hydroxybenzothiazole	AND	ocean*
Hydroxybenzothiazole	AND	environment*	AND	concentrations
Hydroxybenzothiazole	AND	toxicit*
Benzothiazole-2-sulfonic acid	OR	BTSO3	AND	tire
Benzothiazole-2-sulfonic acid	OR	BTSO3	AND	tyre
Benzothiazole-2-sulfonic acid	OR	BTSO3	AND	water
Benzothiazole-2-sulfonic acid	OR	BTSO3	AND	soil
Benzothiazole-2-sulfonic acid	OR	BTSO3	AND	sediment*
Benzothiazole-2-sulfonic acid	OR	BTSO3	AND	suspended matter
Benzothiazole-2-sulfonic acid	OR	BTSO3	AND	dust
Benzothiazole-2-sulfonic acid	OR	BTSO3	AND	air
Benzothiazole-2-sulfonic acid	OR	BTSO3	AND	PM20
Benzothiazole-2-sulfonic acid	OR	BTSO3	AND	PM10
Benzothiazole-2-sulfonic acid	OR	BTSO3	AND	PM2.5
Benzothiazole-2-sulfonic acid	OR	BTSO3	AND	airborne PM
Benzothiazole-2-sulfonic acid	OR	BTSO3	AND	food
Benzothiazole-2-sulfonic acid	OR	BTSO3	AND	consumer product*
Benzothiazole-2-sulfonic acid	OR	BTSO3	AND	marine environmen*
Benzothiazole-2-sulfonic acid	OR	BTSO3	AND	terrestrial
Benzothiazole-2-sulfonic acid	OR	BTSO3	AND	estuar*
Benzothiazole-2-sulfonic acid	OR	BTSO3	AND	ocean*
Benzothiazole-2-sulfonic acid	OR	BTSO3	AND	environment*	AND	concentrations
Benzothiazole-2-sulfonic acid	OR	BTSO3	AND	toxicit*
4-Hydroxydiphenylamine	AND	tire
4-Hydroxydiphenylamine	AND	tyre
4-Hydroxydiphenylamine	AND	water
4-Hydroxydiphenylamine	AND	soil
4-Hydroxydiphenylamine	AND	sediment*
4-Hydroxydiphenylamine	AND	suspended matter
4-Hydroxydiphenylamine	AND	dust
4-Hydroxydiphenylamine	AND	air
4-Hydroxydiphenylamine	AND	PM20
4-Hydroxydiphenylamine	AND	PM10
4-Hydroxydiphenylamine	AND	PM2.5
4-Hydroxydiphenylamine	AND	airborne PM
4-Hydroxydiphenylamine	AND	food
4-Hydroxydiphenylamine	AND	consumer product*
4-Hydroxydiphenylamine	AND	marine environmen*
4-Hydroxydiphenylamine	AND	terrestrial
4-Hydroxydiphenylamine	AND	estuar*
4-Hydroxydiphenylamine	AND	ocean*
4-Hydroxydiphenylamine	AND	environment*	AND	concentrations
4-Hydroxydiphenylamine	AND	toxicit*
6-PPD	OR	6PPD	OR	6 PPD	AND	tire
6-PPD	OR	6PPD	OR	6 PPD	AND	tyre
6-PPD	OR	6PPD	OR	6 PPD	AND	water
6-PPD	OR	6PPD	OR	6 PPD	AND	soil
6-PPD	OR	6PPD	OR	6 PPD	AND	sediment*
6-PPD	OR	6PPD	OR	6 PPD	AND	suspended matter
6-PPD	OR	6PPD	OR	6 PPD	AND	dust
6-PPD	OR	6PPD	OR	6 PPD	AND	air
6-PPD	OR	6PPD	OR	6 PPD	AND	PM20
6-PPD	OR	6PPD	OR	6 PPD	AND	PM10
6-PPD	OR	6PPD	OR	6 PPD	AND	PM2.5
6-PPD	OR	6PPD	OR	6 PPD	AND	airborne PM
6-PPD	OR	6PPD	OR	6 PPD	AND	food
6-PPD	OR	6PPD	OR	6 PPD	AND	consumer product*
6-PPD	OR	6PPD	OR	6 PPD	AND	marine environmen*
6-PPD	OR	6PPD	OR	6 PPD	AND	terrestrial
6-PPD	OR	6PPD	OR	6 PPD	AND	estuar*
6-PPD	OR	6PPD	OR	6 PPD	AND	ocean*
6-PPD	OR	6PPD	OR	6 PPD	AND	environment*	AND	concentrations
6-PPD	OR	6PPD	OR	6 PPD	AND	toxicit*
6-PPD-quinone	OR	6 PPD quinone	AND	tire
6-PPD-quinone	OR	6 PPD quinone	AND	tyre
6-PPD-quinone	OR	6 PPD quinone	AND	water
6-PPD-quinone	OR	6 PPD quinone	AND	soil
6-PPD-quinone	OR	6 PPD quinone	AND	sediment*
6-PPD-quinone	OR	6 PPD quinone	AND	suspended matter
6-PPD-quinone	OR	6 PPD quinone	AND	dust
6-PPD-quinone	OR	6 PPD quinone	AND	air
6-PPD-quinone	OR	6 PPD quinone	AND	PM20
6-PPD-quinone	OR	6 PPD quinone	AND	PM10
6-PPD-quinone	OR	6 PPD quinone	AND	PM2.5
6-PPD-quinone	OR	6 PPD quinone	AND	airborne PM
6-PPD-quinone	OR	6 PPD quinone	AND	food
6-PPD-quinone	OR	6 PPD quinone	AND	consumer product*
6-PPD-quinone	OR	6 PPD quinone	AND	marine environmen*
6-PPD-quinone	OR	6 PPD quinone	AND	terrestrial
6-PPD-quinone	OR	6 PPD quinone	AND	estuar*
6-PPD-quinone	OR	6 PPD quinone	AND	ocean*
6-PPD-quinone	OR	6 PPD quinone	AND	environment*	AND	concentrations
6-PPD-quinone	OR	6 PPD quinone	AND	toxicit*
6-PPD-Q	OR	6 PPD Q	OR	6PPD-Q	AND	tyre
6-PPD-Q	OR	6 PPD Q	OR	6PPD-Q	AND	water
6-PPD-Q	OR	6 PPD Q	OR	6PPD-Q	AND	soil
6-PPD-Q	OR	6 PPD Q	OR	6PPD-Q	AND	sediment*
6-PPD-Q	OR	6 PPD Q	OR	6PPD-Q	AND	suspended matter
6-PPD-Q	OR	6 PPD Q	OR	6PPD-Q	AND	dust
6-PPD-Q	OR	6 PPD Q	OR	6PPD-Q	AND	air
6-PPD-Q	OR	6 PPD Q	OR	6PPD-Q	AND	PM20
6-PPD-Q	OR	6 PPD Q	OR	6PPD-Q	AND	PM10
6-PPD-Q	OR	6 PPD Q	OR	6PPD-Q	AND	PM2.5
6-PPD-Q	OR	6 PPD Q	OR	6PPD-Q	AND	airborne PM
6-PPD-Q	OR	6 PPD Q	OR	6PPD-Q	AND	food
6-PPD-Q	OR	6 PPD Q	OR	6PPD-Q	AND	consumer product*
6-PPD-Q	OR	6 PPD Q	OR	6PPD-Q	AND	marine environmen*
6-PPD-Q	OR	6 PPD Q	OR	6PPD-Q	AND	terrestrial
6-PPD-Q	OR	6 PPD Q	OR	6PPD-Q	AND	estuar*
6-PPD-Q	OR	6 PPD Q	OR	6PPD-Q	AND	ocean*
6-PPD-Q	OR	6 PPD Q	OR	6PPD-Q	AND	environment*	AND	concentrations
6-PPD-Q	OR	6 PPD Q	OR	6PPD-Q	AND	toxicit*
PPD derivativ*	AND	tire
PPD derivativ*	AND	tyre
PAH*	AND	tire
PAH*	AND	tyre
octyl phenol ethoxylates	AND	tire
octyl phenol ethoxylates	AND	tyre
chlorinated paraffins	AND	tire
chlorinated paraffins	AND	tyre
Zinc	OR	Zn	AND	tire
Zinc	OR	Zn	AND	tyre

## Sheet: SI.2_literature list
					Particulate Tire Wear emission					Leachables				Volatiles
Authors	Year	Title	Journal	DOI	General	Analysis method	Emission characteristics	Parameters affecting tire emission	Exposure Pathways	General	Analysis method	Emission characteristics	Exposure Pathways	General	Analysis method	Emission characteristics	Parameters affecting tire emission	Exposure Pathways	changes related to climate	changes related to electric vehicles	Primary literature	Secondary Literature
Aatmeeyata; Kaul, DS; Sharma, M	2009	Traffic generated non-exhaust particulate emissions from concrete pavement: A mass and particle size study for two-wheelers and small cars	Atmospheric Environment	10.1016/j.atmosenv.2009.07.032	x		x														x
Aatmeeyata, Sharma M.	2010	Polycyclic aromatic hydrocarbons, elemental and organic carbon emissions from tire-wear	Science of The Total Environment	10.1016/j.scitotenv.2010.06.011	x		x			x				x							x
Aatmeeyata; Sharma, M	2010	Contribution of Traffic-Generated Nonexhaust PAHs, Elemental Carbon, and Organic Carbon Emission to Air and Urban Runoff Pollution	Journal of Environmental Engineering	10.1061/(asce)ee.1943-7870.0000274	x		x			x											x
Abaza, OA; Dahms, D	2021	Performance Evaluation of Studded Tire Ruts for Asphalt Mix Designs in a Cold Region Environment	Transportation Research Record	10.1177/0361198121994120	x			x											x			x
Abdul Sattar M, Patnaik A.	2023	Molecular Insights into Antioxidant Efficiency of Melanin: A Sustainable Antioxidant for Natural Rubber Formulations	J Phys Chem B	10.1021/acs.jpcb.3c03523						x		x									x
Adamiec, E	2017	Road Environments: Impact of Metals on Human Health in Heavily Congested Cities of Poland	International Journal of Environmental Research and Public Health	10.3390/ijerph14070697	x	x				x	x										x
Adamiec, E	2017	TRAFFIC RELATED METALS AS SOURCES OF URBAN ENVIRONMENT POLLUTION: A CASE STUDY OF KRAKOW, POLAND	0	10.2495/eco170081						x											x
Akanyange, SN; Zhang, Y; Zhao, X; Adom-Asamoah, G; Ature, ARA; Anning, C; Tianpeng, C; Zhao, H; Lyu, X; Crittenden, JC	2022	A holistic assessment of microplastic ubiquitousness: Pathway for source identification in the environment	Sustainable Production and Consumption	10.1016/j.spc.2022.06.020	x		x	x	x													x
Alexandrova, O; Kaloush, KE; Allen, JO;	2007	Impact of Asphalt Rubber Friction Course Overlays on Tire Wear Emissions and Air Quality Models for Phoenix, Arizona, Airshed	Transportation Research Record: Journal of the Transportation Research Board	doi.org/10.3141/2011-11	x	x	x	x													x
Alhelou, R; Seiwert, B; Reemtsma, T	2019	Hexamethoxymethylmelamine - A precursor of persistent and mobile contaminants in municipal wastewater and the water cycle	Water Research	10.1016/j.watres.2019.114973						x			x								x
Al-Thani, H; Koc, M; Fountoukis, C; Isaifan, RJ	2020	Evaluation of particulate matter emissions from non-passenger diesel vehicles in Qatar	Journal of The Air & Waste Management Association	10.1080/10962247.2019.1704939	x	x			x												x
Alves, CA; Gomes, J; Nunes, T; Duarte, M; Calvo, A; Custódio, D; Pio, C; Karanasiou, A; Querol, X	2015	Size-segregated particulate matter and gaseous emissions from motor vehicles in a road tunnel	Atmospheric Research	10.1016/j.atmosres.2014.08.002	x		x														x
Alves, CA; Vicente, AMP; Calvo, AI; Baumgardner, D; Amato, F; Querol, X; Pio, C; Gustafsson, M	2020	Physical and chemical properties of non-exhaust particles generated from wear between pavements and tyres	Atmospheric Environment	10.1016/j.atmosenv.2019.117252	x	x	x			x	x										x
Amato, F; Pandolfi, M; Moreno, T; Furger, M; Pey, J; Alastuey, A; Bukowiecki, N; Prevot, ASH; Baltensperger, U; Querol, X	2011	Sources and variability of inhalable road dust particles in three European cities	Atmospheric Environment	10.1016/j.atmosenv.2011.06.003	x		x		x												x
Amato, F; Querol, X; Johansson, C; Nagl, C; Alastuey, A	2010	A review on the effectiveness of street sweeping, washing and dust suppressants as urban PM control methods	SCIENCE OF THE TOTAL ENVIRONMENT	10.1016/j.scitotenv.2010.04.025	x		x												x			x
Ao YT, Chen YC, Ding WH.	2021	Deep eutectic solvent-based ultrasound-assisted emulsification microextraction for the rapid determination of benzotriazole and benzothiazole derivatives in surface water samples	J Hazard Mater	10.1016/j.jhazmat.2020.123383						x	x		x								x
AQEG	2019	Non-Exhaust Emissions from Road Traffic			x																	x
Armada, D; Celeiro, M; Dagnac, T; Llompart, M	2022	Green methodology based on active air sampling followed by solid phase microextraction and gas chromatography-tandem mass spectrometry analysis to determine hazardous substances in different environments related to tire rubber	Journal of Chromatography A	10.1016/j.chroma.2022.462911										x	x	x					x
Armada, D; Celeiro, M; Martinez-Fernandez, A; Nurerk, P; Dagnac, T; Llompart, M	2021	Miniaturized active air sampling method for the analysis of tire rubber pollutants from indoor and outdoor places	IEEE Journal of Solid-state Circuits	10.1002/jssc.202001249										x	x	x					x
Athanasopoulou, E; Tombrou, M; Russell, AG; Karanasiou, A; Eleftheriadis, K; Dandou, A	2010	Implementation of road and soil dust emission parameterizations in the aerosol model CAMx: Applications over the greater Athens urban area affected by natural sources	Journal of Geophysical Research	10.1029/2009jd013207	x				x													x
Avagyan, R; Sadiktsis, I; Thorsén, G; Östman, C; Westerholm, R	2013	Determination of benzothiazole and benzotriazole derivates in tire and clothing textile samples by high performance liquid chromatography-electrospray ionization tandem mass spectrometry	Journal of Chromatography A	10.1016/j.chroma.2013.07.087						x	x	x									x
Azimi, A; Bakhtiari, AR; Tauler, R	2020	Polycyclic aromatic hydrocarbon source fingerprints in the environmental samples of Anzali-South of Caspian Sea	Environmental science and pollution research international	10.1007/s11356-020-09588-1						x		x									x
Badami, MM; Tohidi, R; Farahani, VJ; Sioutas, C	2023	Size-segregated source identification of water-soluble and water-insoluble metals and trace elements of coarse and fine PM in central Los Angeles	Atmospheric Environment	10.1016/j.atmosenv.2023.119984	x		x		x												x
Baensch-Baltruschat, B; Kocher, B; Kochleus, C; Stock, F; Reifferscheid, G	2021	Tyre and road wear particles - A calculation of generation, transport and release to water and soil with special regard to German roads	Science of The Total Environment	10.1016/j.scitotenv.2020.141939	x				x													x
Baensch-Baltruschat, B; Kocher, B; Stock, F; Reifferscheid, G	2020	Tyre and road wear particles (TRWP)-A review of generation, properties, emissions, human health risk, ecotoxicity, and fate in the environment	Science of The Total Environment	10.1016/j.scitotenv.2020.137823	x				x													x
Bai, GT; Fu, JY; Zhou, Q; Pan, XL	2023	Real-Time Pyrolysis Dynamics of Thermally Aged Tire Microplastics by TGA-FTIR-GC/MS	Water	10.3390/w15101944	x	x															x
Barbee, R; Vermij, P; van de Laak, WJ	2004	Policy development for the reduction of pollution caused by traffic experiences from The Netherlands	WATER SCIENCE AND TECHNOLOGY	10.2166/wst.2004.0191	x				x													x
Barber, TR; Claes, S; Ribeiro, F; Dillon, AE; More, SL; Thornton, S; Unice, KM; Weyrauch, S; Reemtsma, T	2024	Abundance and distribution of tire and road wear particles in the Seine River, France	Science of the Total Environment	10.1016/j.scitotenv.2023.169633	x	x	x		x												x
Barbosa, AE; Fontul, S; Freire, AC; Simões, AR	2023	Road Pavement, Road Pollution, and Sustainability under Climate Change Increased Temperature	Applied Sciences	10.3390/APP13126949	x				x										x		x
Barr, BC; Andradóttir, HO; Thorsteinsson, T; Erlingsson, S	2021	Mitigation of Suspendable Road Dust in a Subpolar, Oceanic Climate	Sustainability	10.3390/su13179607	x		x		x										x			x
Baumann, W; Ismeier, M	1998	Kautschuk und Gummi - Daten und Fakten zum Umweltschutz	Angewandte Chemie International Edition	10.1007/978-3-642-58916-4						x				x		x						x
Beddows, DCS; Harrison, RM	2021	PM10 and PM2.5 emission factors for non-exhaust particles from road vehicles: Dependence upon vehicle mass and implications for battery electric vehicles	Atmospheric Environment	10.1016/j.atmosenv.2020.117886	x			x												x	x
Beita-Sandí, W; Selbes, M; Ersan, MS; Karanfil, T	2019	Release of Nitrosamines and Nitrosamine Precursors from Scrap Tires	Environmental Science and Technology Letters	10.1021/acs.estlett.9b00172						x											x
Beji A, Deboudt K, Muresan B, Khardi S, Flament P, Fourmentin M, Lumiere L.	2023	Physical and chemical characteristics of particles emitted by a passenger vehicle at the tire-road contact	0	10.1016/j.chemosphere.2023.139874	x	x	x			x	x										x
Beji, A; Deboudt, K; Khardi, S; Muresan, B; Flament, P; Fourmentin, M; Lumière, L	2020	Non-exhaust particle emissions under various driving conditions: Implications for sustainable mobility	Transportation Research Part D-transport and Environment	10.1016/j.trd.2020.102290	x		x														x
Beji, A; Deboudt, K; Khardi, S; Muresan, B; Lumière, L	2020	Determinants of rear-of-wheel and tire-road wear particle emissions by light-duty vehicles using on-road and test track experiments	Atmospheric Pollution Research	10.1016/j.apr.2020.12.014	x		x	x													x
Belkacem, I; Helali, A; Khardi, S; Slimi, K	2022	Investigations on vehicle non-exhaust particle emissions: real-time measurements	International Journal of Environmental Science and Technology	10.1007/s13762-022-03955-w	x	x	x	x													x
Bertling, J; Bertling, R; Hamann, L	2018	Kunststoffe in der Umwelt: Mikro- und Makroplastik	Fraunhofer UMSICHT	10.24406/UMSICHT-N-497117	x		x															x
Budai, P; Clement, A	2011	Refinement of national-scale heavy metal load estimations in road runoff based on field measurements	Transportation Research Part D-transport and Environment	10.1016/j.trd.2010.12.003	x		x														x
Budhiraja, V; Music, B; Krzan, A	2022	Magnetic Extraction of Weathered Tire Wear Particles and Polyethylene Microplastics	CERN European Organization for Nuclear Research - Zenodo	10.3390/polym14235189	x	x															x
Büks, F; Kaupenjohann, M	2020	Global concentrations of microplastics in soils - a review	The Soil	10.5194/soil-6-649-2020	x				x													x
Cadle, SH; Williams, RL	1979	Gas and Particle Emissions from Automobile Tires in Laboratory and Field Studies	Rubber Chemistry and Technology	10.5254/1.3535198	x		x		x	x			x	x				x			x
Calarnou, L; Traïkia, M; Leremboure, M; Malosse, L; Dronet, S; Delort, AM; Besse-Hoggan, P; Eyheraguibel, B	2023	Assessing biodegradation of roadway particles via complementary mass spectrometry and NMR analyses	Science of the Total Environment	10.1016/j.scitotenv.2023.165698						x	x	x	x								x
Cao, G; Wang, W; Zhang, J; Wu, P; Qiao, H; Li, H; Huang, G; Yang, Z; Cai, Z	2023	Occurrence and Fate of Substituted p-Phenylenediamine-Derived Quinones in Hong Kong Wastewater Treatment Plants	Environmental Science and Technology	10.1021/acs.est.3c03758						x			x								x
Cao, G; Wang, W; Zhang, J; Wu, P; Zhao, X; Yang, Z; Hu, D; Cai, Z	2022	New Evidence of Rubber-Derived Quinones in Water, Air, and Soil	Environmental Science and Technology	10.1021/acs.est.1c07376						x	x		x								x
Cao, J; Huang, HB; Jiao, RN; Pei, JQ; Xu, YW; RuiRen; Wang, YG	2022	The study of wear particle emissions of soft rubber on rolling contact under braking conditions	Wear	10.1016/j.wear.2022.204431	x		x	x													x
Carrero, JA; Arana, G; Madariaga, JM	2014	Use of Raman spectroscopy and scanning electron microscopy for the detection and analysis of road transport pollution	0	10.1039/9781782621485-00178	x	x																x
Chae E, Choi SS.	2022	Analysis of Polymeric Components in Particulate Matter Using Pyrolysis-Gas Chromatography/Mass Spectrometry	Polymers	10.3390/polym14153122	x	x															x
Chae, E; Choi S	2023	Comparison of polymeric components and tire wear particle contents in particulate matter collected at bus stop and college campus	Heliyon	10.1016/j.heliyon.2023.e16558	x	x															x
Chae, E; Choi, SS	2021	Influence of particle size on inhomogeneity in rubber compositions of NR/BR blend wear particles by single particle analysis	Polymers for Advanced Technologies	10.1002/pat.5565	x	x	x														x
Chae, E; Choi, SS	2023	Quantification of tire tread wear particle in road dust through pyrolytic technique	Heliyon	10.1016/j.heliyon.2023.e17796	x	x															x
Chae, E; Jung, U; Choi SS	2024	Types and concentrations of tire wear particles (TWPs) in road dust generated in slow lanes	Environmental Pollution	10.1016/j.envpol.2024.123670	x		x														x
Chae, E; Jung, U; Choi, SS	2021	Quantification of tire tread wear particles in microparticles produced on the road using oleamide as a novel marker	Environmental Pollution	10.1016/j.envpol.2021.117811	x	x				x	x										x
Challis, JK; Popick, H; Prajapati, S; Harder, P; Giesy, JP; McPhedran, K; Brinkmann, M	2021	Occurrences of Tire Rubber-Derived Contaminants in Cold-Climate Urban Runoff	Environmental Science and Technology Letters	10.1021/acs.estlett.1c00682						x		x	x						x		x
Chang, XD; Huang, HB; Jiao, RN; Liu, JP	2020	Experimental investigation on the characteristics of tire wear particles under different non-vehicle operating parameters	Tribology International	10.1016/j.triboint.2020.106354	x		x	x													x
Charbouillot, T; Janet, DC; Schaal, P; Beynier, I; Boulat, JM; Grandchamp, A; Biesse, F	2023	Methodology for the direct measurement of tire emission factors	Science of the Total Environment	10.1016/j.scitotenv.2022.160853	x		x		x												x
Chen, CY; Lu, TH; Wang, WM; Liao, CM	2022	Assessing regional emissions of vehicle-based tire wear particle from macro-to micro/nano-scales with pandemic lockdowns and electromobility scenarios implications	Chemosphere	10.1016/j.chemosphere.2022.137209	x			x	x											x		x
Chen, LWA; Wang, XL; Lopez, B; Wu, GY; Ho, SSH; Chow, JC; Watson, JG; Yao, Q; Yoon, S; Jung, H	2023	Contributions of non-tailpipe emissions to near-road PM2.5 and PM10: A chemical mass balance study	Environmental Pollution	10.1016/j.envpol.2023.122283	x		x		x	x											x
Chen, X; Zhang, BY; Wang, DL; Chen, L; Du, ZX; Wu, YP	2021	Traceability of VOCs in tire inner liner by chromatography-mass spectrometry	Environmental Science and Pollution Research	10.1007/s11356-021-16284-1										x							x
Chu L, Kan M, Jerrams S, Zhang R, Xu Z, Liu L, Wen S, Zhang L.	2022	Constructing Chemical Interface Layers by Using Ionic Liquid in Graphene Oxide/Rubber Composites to Achieve High-Wear Resistance in Environmental-Friendly Green Tires	ACS Appl Mater Interfaces	10.1021/acsami.1c21605	x			x													x
Cong, L; Zhai, JX; Yan, GX; Liu, JK; Wu, YN; Wang, Y; Zhang, ZM; Zhang, MX	2019	Lead isotope trends and sources in the atmosphere at the artificial wetland	PeerJ	10.7717/peerj.7851						x											x
Councell, TB; Duckenfield, KU; Landa, ER; Callender, E	2004	Tire-wear particles as a source of zinc to the environment	Environmental Science & Technology	10.1021/es034631f						x			x									x
Craig, KJ; Baringer, LM; Chang, SY; McCarthy, MC; Bai, S; Seagram, AF; Ravi, V; Landsberg, K; Eisinger, DS	2020	Modeled and measured near-road PM2.5 concentrations: Indianapolis and Providence cases	Atmospheric Environment	10.1016/j.atmosenv.2020.117775	x		x		x												x
Crosta, GF	2011	Morphological classification and microanalysis of tire tread particles worn by abrasion or corrosion	Proceedings of SPIE	10.1117/12.883231	x	x			x	x	x										x
Cuéllar-Alvarez, Y; Clappier, A; Osses, M; Thunis, P; Belalcázar-Cerón, LC	2022	Well-to-wheel emissions and abatement strategies for passenger vehicles in two Latin American cities	Environmental Science and Pollution Research	10.1007/s11356-022-20885-9	x				x											x		x
Cunha-Lopes, I; Alves, CA; Rienda, IC; Faria, T; Lucarelli, F; Querol, X; Amato, F; Almeida, SM	2022	Characterisation of non-exhaust emissions from road traffic in Lisbon	Atmospheric Environment	10.1016/j.atmosenv.2022.119421	x				x												x
Cunha-Lopes, I; Alves, CA; Rienda, IC; Lucarelli, F; Diapouli, E; Almeida, SM	2023	Characterisation of vehicle emissions in a road tunnel in Lisbon	Atmospheric research	10.1016/j.atmosres.2023.106995	x	x	x														x
Da Silva, MM; Cunha, RH; Neto, AC	2012	A SIMPLIFIED MODEL FOR EVALUATING TIRE WEAR DURING CONCEPTUAL DESIGN	International Journal of Automotive Technology	10.1007/s12239-012-0092-6	x			x													x
Dall'Osto, M; Beddows, DCS; Gietl, JK; Olatunbosun, OA; Yang, XG; Harrison, RM	2014	Characteristics of tyre dust in polluted air: Studies by single particle mass spectrometry (ATOFMS)	Atmospheric Environment	10.1016/j.atmosenv.2014.05.026	x	x	x														x
Dalmau, ME; Augsburg, K; Wenzel, F; Ivanov, V	2020	Tire Particle Emissions: Demand on Reliable Characterization	TIRE SCIENCE AND TECHNOLOGY	10.2346/tire.19.170181	x	x	x															x
Dao, CD; Duong, LT; Nguyen, THT; Nguyen, HLT; Nguyen, HT; Dang, QT; Dao, NN; Pham, CN; Nguyen, CH; Duong, DC; Bui, TT; Nguyen, BQ	2023	Plastic waste in sandy beaches and surface water in Thanh Hoa, Vietnam: abundance, characterization, and sources	Environmental Monitoring & Assessment	10.1007/s10661-022-10868-1	x				x												x
Davis, AP; Shokouhian, M; Ni, SB	2001	Loading estimates of lead, copper, cadmium, and zinc in urban runoff from specific sources	Chemosphere	10.1016/s0045-6535(00)00561-0						x			x								x
De Oliveira, T; Muresan, B; Ricordel, S; Lumière, L; Truong, XT; Poirier, L; Gasperi, J	2024	Realistic assessment of tire and road wear particle emissions and their influencing factors on different types of roads	Journal of Hazardous Materials	10.1016/j.jhazmat.2023.133301	x	x	x														x
Degaffe, FS; Turner, A	2011	Leaching of zinc from tire wear particles under simulated estuarine conditions	Chemosphere	10.1016/j.chemosphere.2011.06.047						x		x	x								x
Dell'Annunziata, GN; Adiletta, G; Farroni, F; Sakhnevych, A; Timpone, F	2023	Tire Wear Sensitivity Analysis and Modeling Based on a Statistical Multidisciplinary Approach for High-Performance Vehicles	Lubricants	10.3390/lubricants11070269	x		x	x														x
Dennis, NN; Braun AJ; Gan J	2024	A high-throughput analytical method for complex contaminant mixtures in biosolids	Environmental Pollution	10.1016/j.envpol.2024.123517						x	x		x								x
Depaolini, AR; Bianchi, G; Fornai, D; Cardelli, A; Badalassi, M; Cardelli, C; Davoli, E	2017	Physical and chemical characterization of representative samples of recycled rubber from end-of-life tires	Chemosphere	10.1016/j.chemosphere.2017.06.093						x		x	x								x
Dewapriya, P; Rousis, N; Rauert, C; Thomaidis, NS; Thomas, KV	2023	High-Resolution Mass Spectrometric Profiling of Stormwater in an Australian Creek	ACS ES&T Water	10.1021/acsestwater.3c00119						x	x										x
Diana, Z; Vegh, T; Karasik, R; Bering, J; Caldas, JDL; Pickle, A; Rittschof, D; Lau, W; Virdin, J	2022	The evolving global plastics policy landscape: An inventory and effectiveness review	ENVIRONMENTAL SCIENCE & POLICY	10.1016/j.envsci.2022.03.028	x		x															x
Díaz-Jaramillo, M; Gonzalez, M; Tomba, JP; Silva, LI; Islas, MS	2023	Occurrence and dynamics of microplastics and emerging concern microparticles in coastal sediments: Impact of stormwater upgrade and port-associated facilities	Science of The Total Environment	10.1016/j.scitotenv.2023.165724	x	x															x
Dornoff, J; Rodríguez, F	2024	Euro 7: The new emission standard for light-and heavy-duty vehicles in the European Union	ICCT POLICY UPDATE		x																	x
Dörrie, H; Schröder, C; Wies, B	2010	Winter Tires: Operating Conditions, Tire Characteristics and Vehicle Driving Behavior	Tire Science and Technology	10.2346/1.3428961	x			x													x
Eisentraut, P; Dümichen, E; Ruhl, AS; Jekel, M; Albrecht, M; Gehde, M; Braun, U	2018	Two Birds with One Stone-Fast and Simultaneous Analysis of Microplastics: Microparticles Derived from Thermoplastics and Tire Wear	Environmental Science and Technology Letters	10.1021/acs.estlett.8b00446	x	x															x
Elhadi, RE; Abdullah, AM; Abdullah, AH; Ash'aari, ZH; Khan, MF	2018	Seasonal Variations of Atmospheric Particulate Matter and its Content of Heavy Metals in Klang Valley, Malaysia	Aerosol and Air Quality Research	10.4209/aaqr.2017.03.0113	x		x														x
Evangeliou, N; Grythe, H; Klimont, Z; Heyes, C; Eckhardt, S; Lopez-Aparicio, S; Stohl, A	2020	Atmospheric transport is a major pathway of microplastics to remote regions	Nature Communications	10.1038/s41467-020-17201-9	x				x													x
Fang, XZ; Wu, L; Zhang, QJ; Zhang, J; Wang, AX; Zhang, YJ; Zhao, JB; Mao, HJ	2019	Characteristics, emissions and source identifications of particle polycyclic aromatic hydrocarbons from traffic emissions using tunnel measurement	Transportation Research Part D-transport and Environment	10.1016/j.trd.2018.02.021						x	x	x									x
Farao, C; Canepari, S; Perrino, C; Harrison, RM	2014	Sources of PM in an Industrial Area: Comparison between Receptor Model Results and Semiempirical Calculations of Source Contributions	Aerosol and Air Quality Research	10.4209/aaqr.2013.08.0281	x		x		x												x
Farroni, F; Sakhnevych, A; Timpone, F	2017	Physical modelling of tire wear for the analysis of the influence of thermal and frictional effects on vehicle performance	0	10.1177/1464420716666107	x		x	x													x
Feißel, T; Büchner, F; Kunze, M; Rost, J; Ivanov, V; Augsburg, K; Hesse, D; Gramstat, S	2022	Methodology for Virtual Prediction of Vehicle-Related Particle Emissions and Their Influence on Ambient PM10 in an Urban Environment	Atmosphere	10.3390/atmos13111924	x		x	x	x												x
Feißel, T; Hesse, D; Augsburg, K; Gramstat, S	2020	Measurement of Vehicle Related Non Exhaust Particle Emissions under Real Driving Conditions	Conference: EuroBrake 2020	10.4672/EB2020-STP-039	x			x													x
Feißel, T; Hesse, D; Ricciardi, V; Schiele, M; Augsburg, K	2022	Novel Approaches for Measuring and Predicting Particulate Emissions from Automotive Brakes and Tires	Proceedings	10.1007/978-3-662-64550-5_40	x		x	x													x
Feißel, T; Kunze, M; Hesse, D; Ivanov, V; Augsburg, K; Gramstat, S	2024	On-Road Vehicle Measurement of Tire Wear Particle Emissions and Approach for Emission Prediction	Tire Science and Technology	10.2346/tire.22.21024	x			x													x
Felsing, S; Kochleus, C; Buchinger, S; Brennholt, N; Stock, F; Reifferscheid, G	2018	A new approach in separating microplastics from environmental samples based on their electrostatic behavior	Environmental Pollution	10.1016/j.envpol.2017.11.013	x	x			x												x
Fiala, M; Hwang, HM	2021	Influence of Highway Pavement on Metals in Road Dust: a Case Study in Houston, Texas	Water Air and Soil Pollution	10.1007/s11270-021-05139-7						x											x
Fomba, KW; van Pinxteren, D; Müller, K; Spindler, G; Herrmann, H	2018	Assessment of trace metal levels in size-resolved particulate matter in the area of Leipzig	Atmospheric Environment	10.1016/j.atmosenv.2017.12.024	x	x															x
Forehead, H; Huynh, N	2018	Review of modelling air pollution from traffic at street-level - The state of the science	Environmental Pollution	10.1016/j.envpol.2018.06.019	x		x	x														x
Formela, K	2022	Analysis of volatile organic compounds emission in the rubber recycling products quality assessment	Advanced Industrial and Engineering Polymer Research	10.1016/J.AIEPR.2022.07.002										x		x						x
Foroutan, H; Aryal, A; Craine, M; Rakha, H	2025	Projecting airborne tire wear particle emissions in the United States in the era of electric vehicles	Science of The Total Environment	10.1016/j.scitotenv.2025.178848	x			x												x		x
Fort, J; Kobeticová, K; Böhm, M; Podlesny, J; Jelínková, V; Vachtlová, M; Bures, F; Cerny, R	2022	Environmental Consequences of Rubber Crumb Application: Soil and Water Pollution	Polymers	10.3390/polym14071416						x											x
Foscari, A; Schmidt, N; Seiwert, B; Herzke, D; Sempéré, R; Reemtsma, T	2023	Leaching of chemicals and DOC from tire particles under simulated marine conditions	Frontiers in Environmental Science	10.3389/fenvs.2023.1206449						x		x									x
Fuchte, HE; Beck, N; Bieg, E; Bayer, VJ; Achten, C; Krauss, M; Schäffer, A; Smith, KEC	2022	A look down the drain: Identification of dissolved and particle bound organic pollutants in urban runoff waters and sediments*	Environmental Pollution	10.1016/j.envpol.2022.119047	x				x	x			x								x
Gaggini, EL; Polukarova, M; Bondelind, M; Rødland, E; Strömvall, AM; Andersson-Sköld, Y; Sokolova, E	2024	Assessment of fine and coarse tyre wear particles along a highway stormwater system and in receiving waters: Occurrence and transport	Journal of Environmental Management	10.1016/j.jenvman.2024.121989	x				x												x
Gao, ZQ; Cizdziel, JV; Wontor, K; Clisham, C; Focia, K; Rausch, J; Jaramillo-Vogel, D	2022	On airborne tire wear particles along roads with different traffic characteristics using passive sampling and optical microscopy, single particle SEM/EDX, and μ-ATR-FTIR analyses	Frontiers in Environmental Science	10.3389/fenvs.2022.1022697	x	x	x	x	x												x
Gehrig, R; Zeyer, K; Bukowiecki, N; Lienemann, P; Poulikakos, LD; Furger, M; Buchmann, B	2010	Mobile load simulators – A tool to distinguish between the emissions due to abrasion and resuspension of PM10 from road surfaces	Atmospheric Environment	10.1016/j.atmosenv.2010.08.020	x		x	x													x
Gehrke I, Schläfle S, Bertling R, Öz M, Gregory K.	2023	Review: Mitigation measures to reduce tire and road wear particles	Sci Total Environ	10.1016/j.scitotenv.2023.166537	x				x													x
Gelhardt, L; Dittmer, U; Welker, A	2021	Relationship of particle density and organic content in sieve fractions of road-deposited sediments from varying traffic sites based on a novel data set	Science of The Total Environment	10.1016/j.scitotenv.2021.148812	x		x		x												x
Ghanadi, M; Kah, M; Kookana, RS; Padhye, LP	2023	Formation of disinfection by-products from microplastics, tire wear particles, and other polymer-based materials	Water Research	10.1016/j.watres.2022.119528						x			x								x
Giardi, F; Nava, S; Calzolai, G; Pazzi, G; Chiari, M; Faggi, A; Andreini, BP; Collaveri, C; Franchi, E; Nincheri, G; Amore, A; Becagli, S; Severi, M; Traversi, R; Lucarelli, F	2022	PM10 variation, composition, and source analysis in Tuscany (Italy) following the COVID-19 lockdown restrictions	Atmospheric Chemistry and Physics	10.5194/acp-22-9987-2022	x	x			x												x
Gieré, R; Dietze, V	2022	Tire-Abrasion Particles in the Environment	Advances in Polymer Science	10.1007/12_2022_118	x		x	x	x													x
Gonera, J; Napiórkowski, J	2021	Analysis of Car Body and Wheel Geometry Depending on Mileage on the Wear of Tyres in Passenger Cars	International Journal of Automotive Technology	10.1007/s12239-021-0025-3	x			x													x
Gonet, T; Maher, BA	2019	Airborne, Vehicle-Derived Fe-Bearing Nanoparticles in the Urban Environment: A Review	Environmental Science & Technology	10.1021/acs.est.9b01505	x		x															x
Gonzalez, RO; Strekopytov, S; Amato, F; Querol, X; Reche, C; Weiss, D	2016	New Insights from Zinc and Copper Isotopic Compositions into the Sources of Atmospheric Particulate Matter from Two Major European Cities	Environmental Science & Technology	10.1021/acs.est.6b00863	x		x														x
Goßmann, I; Halbach, M; Scholz-Böttcher, BM	2021	Car and truck tire wear particles in complex environmental samples - A quantitative comparison with traditional microplastic polymer mass loads	Science of The Total Environment	10.1016/j.scitotenv.2021.145667	x	x			x												x
Goßmann, I; Herzke, D; Held, A; Schulz, JB; Nikiforov, V; Georgi, C; Evangeliou, N; Eckhardt, S; Gerdts, G; Wurl, O; Scholz‐Böttcher, BM	2023	Occurrence and backtracking of microplastic mass loads including tire wear particles in northern Atlantic air	Nature Communications	10.1038/s41467-023-39340-5	x				x												x
Goßmann, I; Mattsson, K; Hassellöv, M; Crazzolara, C; Held, A; Robinson, T-B; Wurl, O; Scholz‐Böttcher, BM	2023	Unraveling the Marine Microplastic Cycle: The First Simultaneous Data Set for Air, Sea Surface Microlayer, and Underlying Water	Environmental Science and Technology	10.1021/acs.est.3c05002	x				x												x
Goßmann, I; Süßmuth, R; Scholz-Böttcher, BM	2022	Plastic in the air?! - Spider webs as spatial and temporal mirror for microplastics including tire wear particles in urban air	Science of The Total Environment	10.1016/j.scitotenv.2022.155008	x	x															x
Green, C; Bilyanska, A; Bradley, M; Dinsdale, J; Hutt, L; Backhaus, T; Boons, F; Bott, D; Collins, C; Cornell, SE; Craig, M; Depledge, M; Diderich, B; Fuller, R; Galloway, TS; Hutchison, GR; Ingrey, N; Johnson, AC; Kupka, R; Matthiessen, P; Oliver, R; Owen, S; Owens, S; Pickett, J; Robinson, S; Sims, K; Smith, P; Sumpter, JP; Tretsiakova-McNally, S; Wang, MJ; Welton, T; Willis, KJ; Lynch, I	2023	A Horizon Scan to Support Chemical Pollution-Related Policymaking for Sustainable and Climate-Resilient Economies	ENVIRONMENTAL TOXICOLOGY AND CHEMISTRY	10.1002/etc.5620						x												x
Greer, F; Bin Thaneya, A; Apte, JS; Horvath, A	2022	Pavement resurfacing and supply chains are significant contributors to PM2.5 exposure from road transportation: evidence from the San Francisco Bay Area	Environmental Research Letters	10.1088/1748-9326/aca2bc	x					x										x		x
Grob, L; Zeneli, L; Ott, E; Vialetto, J; Bergfreund, J; Takeda, Y; Windhab, EJ	2021	Filter-less separation technique for micronized anthropogenic polymers from artificial seawater	Environmental Science: Water Research & Technology	10.1039/d1ew00553g	x	x			x												x
Grosch, KA	2008	Rubber Abrasion and Tire Wear	Rubber Chemistry and Technology	10.5254/1.3548216	x		x	x													x
Gunawardana, C; Goonetilleke, A; Egodawatta, P; Dawes, L; Kokot, S	2012	Source characterisation of road dust based on chemical and mineralogical composition	Chemosphere	10.1016/j.chemosphere.2011.12.012	x		x		x												x
Guo Q, Men Z, Liu Z, Niu Z, Fang T, Liu F, Wu L, Peng J, Mao H.	2023	Chemical characteristics of fine tire wear particles generated on a tire simulator	Environmental Pollution	10.1016/j.envpol.2023.122399	x		x	x		x											x
Guo, Z; Cheng, Z; Zhang, S; Zhu, H; Zhao, L; Baqar, M; Wang, L; Sun, H	2024	Unexpected Exposure Risks to Emerging Aromatic Amine Antioxidants and p-Phenylenediamine Quinones to Residents: Evidence from External and Internal Exposure as Well as Hepatotoxicity Evaluation	Environment and Health	10.1021/envhealth.3c00205						x			x								x
Gustafsson, M; Blomqvist, G; Gudmundsson, A; Dahl, A; Jonsson, P; Swietlicki, E	2009	Factors influencing PM10 emissions from road pavement wear	Atmospheric Environment	10.1016/j.atmosenv.2008.04.028	x			x													x
Ha SY, Kim GB, Yim UH, Shim WJ, Hong SH, Han GM.	2012	Particle-size distribution of polycyclic aromatic hydrocarbons in urban road dust of Masan, Korea	Archives of Environmental Contamination and Toxicology	10.1007/s00244-012-9765-4						x											x
Ha, JU; Bae, SH; Choi, YJ; Lee, PC; Jeoung, SK; Song, S; Choi, C; Lee, JS; Kim, J; Han, IS	2023	Control of Tire Wear Particulate Matter through Tire Tread Prescription	Polymers	10.3390/polym15132795	x	x		x													x
Ha, JU; Lee, HH; Ryu, G; Lee, PC; Ko, YK; Jeoung, SK	2022	Trends in particulate matter generation from truck and bus radial tires using a wear tester	Journal of Applied Polymer Science	10.1002/app.52190	x		x	x													x
Habre, R; Girguis, M; Urman, R; Fruin, S; Lurmann, F; Shafer, M; Gorski, P; Franklin, M; McConnell, R; Avol, E; Gilliland, F	2020	Contribution of tailpipe and non-tailpipe traffic sources to quasi-ultrafine, fine and coarse particulate matter in southern California	Journal of The Air & Waste Management Association	10.1080/10962247.2020.1826366	x		x														x
Hale, RC; Seeley, ME; La Guardia, MJ; Mai, L; Zeng, EY	2020	A Global Perspective on Microplastics	Journal of Geophysical Research	10.1029/2018jc014719	x		x															x
Halle, L.L., Palmqvist, A., Kampmann, K., Khan, F.R	2020	Ecotoxicology of micronized tire rubber: Past, present and future considerations	Science of The Total Environment	10.1016/j.scitotenv.2019.135694	x		x		x	x		x	x									x
Han, JY; Kwon, JH; Lee, SK; Lee, KC; Kim, HJ	2023	Experimental Evaluation of Tire Tread Wear Detection Using Machine Learning in Real-Road Driving Conditions	IEEE Access	10.1109/access.2023.3263727	x		x	x													x
Hanssen, L; Schmidt, S; Nikiforov, V	2024	Screening of compounds in tire wear road run off	Nordic Council of Ministers							x			x								x
Hao, YZ; Deng, SX; Yang, Y; Song, WB; Tong, H; Qiu, ZW	2019	Chemical Composition of Particulate Matter from Traffic Emissions in a Road Tunnel in Xi'an, China	Aerosol and Air Quality Research	10.4209/aaqr.2018.04.0131	x	x		x	x												x
Harrison, R;, Allan, J; Carruthers, D; Heal, MR; Lewis, AC; Marner, B; Murrells, T; Williams, A	2021	Non-exhaust vehicle emissions of particulate matter and VOC from road traffic: A review	Atmospheric Environment	10.1016/j.atmosenv.2021.118592	x		x							x		x						x
Harrison, RM; Jones, AM; Gietl, J; Yin, JX; Green, DC	2012	Estimation of the Contributions of Brake Dust, Tire Wear, and Resuspension to Nonexhaust Traffic Particles Derived from Atmospheric Measurements	Environmental Science & Technology	10.1021/es300894r	x	x	x														x
Hartmann, NB; Hu, T; Thompson, RC; Hassello, M; Verschoor, A; Daugaard, AE; Rist, S; Karlsson, T; Brennholt, N; Cole, M; Herrling, MP; Hess, MC; Ivleva, NP; Lusher, AL; Wagner, M	2019	Are We Speaking the Same Language? Recommendations for a Definition and Categorization Framework for Plastic Debris	Environmental Science & Technology	10.1021/acs.est.8b05297	x		x															x
He, GC; Zhao, B; Denison, MS	2011	IDENTIFICATION OF BENZOTHIAZOLE DERIVATIVES AND POLYCYCLIC AROMATIC HYDROCARBONS AS ARYL HYDROCARBON RECEPTOR AGONISTS PRESENT IN TIRE EXTRACTS	Environmental Toxicology and Chemistry	10.1002/etc.581						x											x
He, JF; Jin, XX; Hou, CY	2011	Simulation Analysis and Research of Tire Wear	Advanced Materials Research	10.4028/www.scientific.net/amr.299-300.1212	x			x													x
Heinrich, G; Klüppel, M	2022	Basic Mechanisms and Predictive Testing of Tire-Road Abrasion	Advances in Polymer Science	10.1007/12_2022_113	x		x	x														x
Heisler H	2002	Tyres	Advanced Vehicle Technology, Elsevier	10.1016/B978-075065131-8/50009-9	x			x													x
Helm, PA; Raby, M; Kleywegt, S; Sorichetti, RJ; Arabian, G; Smith, D; Howell, ET; Thibeau, J	2024	Assessment of Tire-Additive Transformation Product 6PPD-Quinone in Urban-Impacted Watersheds	ACS ES&T Water	10.1021/acsestwater.3c00589						x			x								x
Hermange, C; Oger, G; Le Chenadec, Y; de Leffe, M; Le Touze, D	2022	In-depth analysis of hydroplaning phenomenon accounting for tire wear on smooth ground	Journal of Fluids and Structures	10.1016/j.jfluidstructs.2022.103555	x			x													x
Hesse, D; Feissel, T; Kunze, M; Bachmann, E; Bachmann, T; Gramstat, S	2022	Comparison of Methods for Sampling Particulate Emissions from Tires under Different Test Environments	Atmosphere	10.3390/atmos13081262	x	x	x	x													x
Hicks, W; Beevers, S; Tremper, AH; Stewart, G; Priestman, M; Kelly, FJ; Lanoisellé, M; Lowry, D; Green, DC	2021	Quantification of non-exhaust particulate matter traffic emissions and the impact of COVID-19 lockdown at London Marylebone road	Atmosphere	10.3390/atmos12020190	x				x												x
Hiki K, Yamamoto H.	2022	Concentration and leachability of N-(1,3-dimethylbutyl)-N'-phenyl-p-phenylenediamine (6PPD) and its quinone transformation product (6PPD-Q) in road dust collected in Tokyo, Japan	Environmental Pollution	10.1016/j.envpol.2022.119082						x			x								x
Hong N, Guan Y, Yang B, Zhong J, Zhu P, Ok YS, Hou D, Tsang DCW, Guan Y, Liu A.	2020	Quantitative source tracking of heavy metals contained in urban road deposited sediments	Journal of Hazardous Materials	10.1016/j.jhazmat.2020.122362	x		x		x												x
Hou, F; Tian, Z; Peter, KT; Wu, C; Gipe, AD; Zhao, H; Alegria, EA; Liu, F; Kolodziej, EP	2019	Quantification of organic contaminants in urban stormwater by isotope dilution and liquid chromatography-tandem mass spectrometry	Analytical and Bioanalytical Chemistry	10.1007/s00216-019-02177-3						x	x		x								x
Hou, S; Wang, Y; Duan, L; Xiu, G	2024	Health Risk Assessment from Exposure to Ambient Volatile Organic Compounds (VOCs) at a Truck Tire Factory in the Yangtze River Delta, China												x	x	x					x
Hoyer, S; Kroll, L; Fischer, B; Pisulla, K; Seidel, A	2022	Release of PAH from Secondary Products Made from End-of-Life Tire Recyclates into 20% Aqueous Ethanol as Assessment of Human Dermal Absorption	Recycling	10.3390/recycling8010006	x				x												x
Hu X, Zhao HN, Tian Z, Peter KT, Dodd MC, Kolodziej EP.	2023	Chemical characteristics, leaching, and stability of the ubiquitous tire rubber-derived toxicant 6PPD-quinone	Environmental Science: Processes & Impacts	10.1039/d3em00047h						x		x	x								x
Hu, LX; Cheng, YX; Wu, D; Fan, L; Zhao, JH; Xiong, Q; Chen, QL; Liu, YS; Ying, GG	2021	Continuous input of organic ultraviolet filters and benzothiazoles threatens the surface water and sediment of two major rivers in the Pearl River Basin	Science of the Total Environment	10.1016/j.scitotenv.2021.149299						x			x								x
Hu, XM; Zhao, HQNN; Tian, ZY; Peter, KT; Dodd, MC; Kolodziej, EP	2022	Transformation Product Formation upon Heterogeneous Ozonation of the Tire Rubber Antioxidant 6PPD (N-(1,3-dimethylbutyl)-N′-phenyl-p-phenylenediamine)	Environmental Science and Technology Letters	10.1021/acs.estlett.2c00187						x		x	x								x
Hua X, Wang D.	2023	Tire-rubber related pollutant 6-PPD quinone: A review of its transformation, environmental distribution, bioavailability, and toxicity	Journal of Hazardous Materials	10.1016/j.jhazmat.2023.132265						x		x	x									x
Huang, J; Li, Z; Wang, Z; Ma, H; Wang, J; Xing, B	2023	Aging, characterization and sorption behavior evaluation of tire wear particles for tetracycline in aquatic environment	Chemosphere	10.1016/j.chemosphere.2023.139116	x		x			x		x									x
Huang, H; Wang, Z; Dai, C; Guo, J; Zhang, X	2022	Volatile organic compounds emission in the rubber products manufacturing processes	Environmental Research	10.1016/j.envres.2022.113485										x	x	x					x
Huang, HB; Chiu, YJ; Jin, XX	2013	Numerical calculation of irregular tire wear caused by tread self-excited vibration and sensitivity analysis	Journal of Mechanical Science and Technology	10.1007/s12206-013-0505-0	x			x													x
Huang, HB; Chiu, YJ; Wang, C; Jin, XX	2015	Three-dimensional global pattern prediction for tyre tread wear	0	10.1177/0954407014537640	x			x													x
Huang, W; Deng, JQ; Liang, J; Xia, XH	2023	Comparison of lead adsorption on the aged conventional microplastics, biodegradable microplastics and environmentally-relevant tire wear particles	0	10.1016/j.cej.2023.141838						x			x								x
Huang, W; Shi, Y; Huang, J; Deng, C; Tang, S; Liu, X; Chen, D	2021	Occurrence of Substituted <i>p</i> -Phenylenediamine Antioxidants in Dusts	Environmental Science & Technology Letters	10.1021/acs.estlett.1c00148						x			x								x
Hüffer, T; Wagner, S; Reemtsma, T; Hofmann, T	2019	Sorption of organic substances to tire wear materials: Similarities and differences with other types of microplastic	Trends in Analytical Chemistry	10.1016/j.trac.2018.11.029						x	x		x									x
Hussein, T; Johansson, C; Karlsson, H; Hansson, HC	2008	Factors affecting non-tailpipe aerosol particle emissions from paved roads: On-road measurements in Stockholm, Sweden	Atmospheric Environment	10.1016/j.atmosenv.2007.09.064	x			x													x
Ichihara, M; Asakawa, D; Yamamoto, A; Sudo, M	2023	Quantitation of guanidine derivatives as representative persistent and mobile organic compounds in water: method development	Analytical and Bioanalytical Chemistry	10.1007/s00216-023-04613-x						x	x										x
Jancsek-Turóczi, B; Hoffer, A; Nyíro-Kósa, I; Gelencsér, A	2013	Sampling and characterization of resuspended and respirable road dust	Journal of Aerosol Science	10.1016/j.jaerosci.2013.07.006	x	x															x
Järlskog, I; Jaramillo-Vogel, D; Rausch, J; Gustafsson, M; Strömvall, AM; Andersson-Sköld, Y	2022	Concentrations of tire wear microplastics and other traffic-derived non-exhaust particles in the road environment	Environment International	10.1016/j.envint.2022.107618	x	x			x												x
Järlskog, I; Jaramillo-Vogel, D; Rausch, J; Perseguers, S; Gustafsson, M; Strömvall, AM; Andersson-Sköld, Y	2022	Differentiating and Quantifying Carbonaceous (Tire, Bitumen, and Road Marking Wear) and Non-carbonaceous (Metals, Minerals, and Glass Beads) Non-exhaust Particles in Road Dust Samples from a Traffic Environment	Water Air and Soil Pollution	10.1007/s11270-022-05847-8	x	x															x
Järlskog, I; Strömvall, AM; Magnusson, K; Galfi, H; Björklund, K; Polukarova, M; Garçao, R; Markiewicz, A; Aronsson, M; Gustafsson, M; Norin, M; Blom, L; Andersson-Sköld, Y	2021	Traffic-related microplastic particles, metals, and organic pollutants in an urban area under reconstruction	Science of The Total Environment	10.1016/j.scitotenv.2021.145503	x				x	x			x								x
Järlskog, I; Strömvall, AM; Magnusson, K; Gustafsson, M; Polukarova, M; Galfi, H; Aronsson, M; Andersson-Sköld, Y	2020	Occurrence of tire and bitumen wear microplastics on urban streets and in sweepsand and washwater	Science of The Total Environment	10.1016/j.scitotenv.2020.138950	x	x			x												x
Jayalakshmamma, MP; Nagara, VN; Borgaonkar, A; Sarkar, D; Sadik, O; Boufadel, M	2023	Characterizing microplastics in urban runoff: A multi-land use assessment with a focus on 1-125 μm size particles	Science of the Total Environment	10.1016/j.scitotenv.2023.166685	x	x			x												x
Jeong, CH; Wang, JM; Hilker, N; Debosz, J; Sofowote, U; Su, YS; Noble, M; Healy, RM; Munoz, T; Dabek-Zlotorzynska, E; Celo, V; White, L; Audette, C; Herod, D; Evans, GJ	2019	Temporal and spatial variability of traffic-related PM2.5 sources: Comparison of exhaust and non-exhaust emissions	Atmospheric Environment	10.1016/j.atmosenv.2018.10.038	x		x			x											x
Jeong, H	2022	Toxic metal concentrations and Cu-Zn-Pb isotopic compositions in tires	Journal of Analytical Science and Technology	10.1186/s40543-021-00312-3	x		x														x
Jeong, S; Ryu, H; Shin, H; Lee, MG; Hong, J; Kim, H; Kwon, JT; Lee, J; Kim, Y	2024	Quantification of tire wear particles in road dust based on synthetic/natural rubber ratio using pyrolysis-gas chromatography–mass spectrometry across diverse tire types	Science of the Total Environment	10.1016/j.scitotenv.2024.173796	x	x	x														x
Jeong, S; Shin, H; Ryu, H; Lee, MG; Hong, J; Kwon, JT; Lee, J; Kim, Y	2023	Rapid estimation of tire-wear particle concentration in road dust using PM10 and traffic data in a ternary plot	Science of the Total Environment	10.1016/j.scitotenv.2023.167227	x	x	x	x													x
Jeong, Y; Lee, S; Woo, SH	2022	Chemical Leaching from Tire Wear Particles with Various Treadwear Ratings	International Journal of Environmental Research and Public Health	10.3390/ijerph19106006						x		x									x
Ji, J; Li, C; Zhang, B; Wu, W; Wang, J; Zhu, J; Liu, D; Gao, R; Ma, Y; Pang, S; Li, X	2022	Exploration of emerging environmental pollutants 6PPD and 6PPDQ in honey and fish samples	Food Chemistry	10.1016/j.foodchem.2022.133640						x			x								x
Jiang, JR; Chen, ZF; Liao, XL; Liu, QY; Zhou, JM; Ou, SP; Cai, ZW	2023	Identifying potential toxic organic substances in leachates from tire wear particles and their mechanisms of toxicity to Scenedesmus obliquus	Journal of Hazardous Materials	10.1016/j.jhazmat.2023.132022						x		x									x
Jiang, RS; Liu, Y; Hu, DW; Zhu, L	2022	Exhaust and non-exhaust airborne particles from diesel and electric buses in Xi'an: A comparative analysis	Chemosphere	10.1016/j.chemosphere.2022.135523	x			x												x		x
Jin R, Wu Y, He Q, Sun P, Chen Q, Xia C, Huang Y, Yang J, Liu M.	2023	Ubiquity of Amino Accelerators and Antioxidants in Road Dust from Multiple Land Types: Targeted and Nontargeted Analysis	Environmental Science and Technology	10.1021/acs.est.3c01448						x		x	x								x
Johannessen C, Helm P, Metcalfe CD.	2021	Runoff of the Tire-Wear Compound, Hexamethoxymethyl-Melamine into Urban Watersheds	Archives of Environmental Contamination and Toxicology	10.1007/s00244-021-00815-5						x											x
Johannessen C, Metcalfe CD.	2022	The occurrence of tire wear compounds and their transformation products in municipal wastewater and drinking water treatment plants	Environmental Monitoring and Assessment	10.1007/s10661-022-10450-9	x				x	x		x	x								x
Johannessen C, Parnis JM.	2021	Environmental modelling of hexamethoxymethylmelamine, its transformation products, and precursor compounds: An emerging family of contaminants from tire wear	Chemosphere	10.1016/j.chemosphere.2021.130914						x			x								x
Johannessen, C; Helm, P; Lashuk, B; Yargeau, V; Metcalfe, CD	2021	The Tire Wear Compounds 6PPD-Quinone and 1,3-Diphenylguanidine in an Urban Watershed	Archives of Environmental Contamination and Toxicology	10.1007/s00244-021-00878-4						x		x	x								x
Johannessen, C; Helm, P; Metcalfe, CD	2021	Detection of selected tire wear compounds in urban receiving waters*	Environmental Pollution	10.1016/j.envpol.2021.117659						x			x								x
Johannessen, C; Helm, PA; Mark Parnis, J; Kleywegt, S; Metcalfe, C.D	2024	Targeted screening of passive samplers as an “Early Warning” of novel contaminants in the Great Lakes Basin	Journal of Great Lakes Research	10.1016/j.jglr.2024.102298						x	x		x								x
Johannessen, C; Liggio, J; Zhang, XM; Saini, A; Harner, T	2022	Composition and transformation chemistry of tire-wear derived organic chemicals and implications for air pollution	Atmospheric Pollution Research	10.1016/j.apr.2022.101533	x		x		x	x												x
Johannessen, C; Saini, A; Zhang, XM; Harner, T	2022	Air monitoring of tire-derived chemicals in global megacities using passive samplers	Environmental Pollution	10.1016/j.envpol.2022.120206						x	x										x
Jose, J; Srimuruganandam, B	2021	Source apportionment of urban road dust using four multivariate receptor models	Environmental Earth Sciences	10.1007/s12665-021-09960-5	x		x		x												x
Jung, U; Choi, SS	2022	Classification and Characterization of Tire-Road Wear Particles in Road Dust by Density	Polymers	10.3390/polym14051005	x	x	x														x
Jung, U; Choi, SS	2023	Carbon black effect on the pyrolysis behavior of natural rubber in tire wear particles	Polymer testing	10.1016/j.polymertesting.2023.108184	x	x															x
Jung, U; Choi, SS	2023	Variation in Abundance Ratio of Isoprene and Dipentene Produced from Wear Particles Composed of Natural Rubber by Pyrolysis Depending on the Particle Size and Thermal Aging	Polymers	10.3390/polym15040929	x		x	x													x
Kalbe, U; Krüger, O; Wachtendorf, V; Berger, W; Hally, S	2013	Development of Leaching Procedures for Synthetic Turf Systems Containing Scrap Tyre Granules	Waste and Biomass Valorization	10.1007/s12649-013-9248-5						x											x
Kam, W; Delfino, RJ; Schauer, JJ; Sioutas, C	2013	A comparative assessment of PM <sub>2.5</sub> exposures in light-rail, subway, freeway, and surface street environments in Los Angeles and estimated lung cancer risk	Environ. Sci.: Processes Impacts	10.1039/C2EM30495C	x	x															x
Kane, M; Zhao, D; De-Larrard, F; Do, MT	2012	Laboratory evaluation of aggregate polishing as a function of load and velocity. Application to the prediction of damages on skid resistance of road surfaces due to trucks and passenger cars	Road Materials and Pavement Design	10.1080/14680629.2011.649424	x			x													x
Kang, T; Kim, H	2023	An Experimental Study on the Component Analysis and Variation in Concentration of Tire and Road Wear Particles Collected from the Roadside	Sustainability	10.3390/su151712815	x	x		x											x		x
Kanu, MO; Basavaiah, N; Meludu, OC; Oniku, AS	2017	Investigating the potential of using environmental magnetism techniques as pollution proxy in urban road deposited sediment	International Journal of Environmental Science and Technology	10.1007/s13762-017-1356-5	x		x														x
Karanasiou, A; Amato, F; Moreno, T; Lumbreras, J; Borge, R; Linares, C; Boldo, E; Alastuey, A; Querol, X	2014	Road Dust Emission Sources and Assessment of Street Washing Effect	Aerosol and Air Quality Research	10.4209/aaqr.2013.03.0074	x			x	x												x
Kayaba, S; Kajino, M	2023	Potential Impacts of Energy and Vehicle Transformation Through 2050 on Oxidative Stress-Inducing PM2.5 Metals Concentration in Japan	GeoHealth	10.1029/2023gh000789	x															x		x
Kayhanian, M; McKenzie, ER; Leatherbarrow, JE; Young, TM	2012	Characteristics of road sediment fractionated particles captured from paved surfaces, surface run-off and detention basins	Science of the Total Environment	10.1016/j.scitotenv.2012.08.077	x		x														x
Keuken M, Denier van der Gon H, van der Valk K.	2010	Non-exhaust emissions of PM and the efficiency of emission reduction by road sweeping and washing in the Netherlands	Science of The Total Environment	10.1016/j.scitotenv.2010.06.052	x				x										x		x
Khan, FR; Rødland, ES; Kole, PJ; Van Belleghem, FGAJ; Jaén-Gil, A; Hansen, SF; Gomiero, A	2024	An overview of the key topics related to the study of tire particles and their chemical leachates: From problems to solutions	TrAC Trends in Analytical Chemistry	10.1016/J.TRAC.2024.117563	x	x			x	x	x		x									x
Khardi, S	2024	Emission Factors of Tyre Wear Particles Emitted by Light Road Vehicles in Real Driving Conditions: A New Challenge for Clean Road Transport to Improve Urban Air Quality	Atmosphere	10.3390/atmos15060665	x	x	x	x													x
Kida, M; Ziembowicz, S; Koszelnik, P	2023	Influence of microplastic decomposition conditions on the emission of substances harmful to the environment	Desalination and Water Treatment	10.5004/dwt.2023.29373						x		x									x
Kim, DG; Kim, HS; Kang, HM; Ko, SO	2016	Pollutant characteristics of road deposited sediments collected by road sweeping	Water Science and Technology	10.2166/wst.2016.198	x				x												x
Kim, G; Lee, S	2018	Characteristics of Tire Wear Particles Generated by a Tire Simulator under Various Driving Conditions	Environmental Science & Technology	10.1021/acs.est.8b03459	x		x	x													x
Kim, J; Park, E; Moon, H; Son, H; Hong, J; Wi, E; Kwon, JT; Seo, D; Kim, Y	2022	Estimation of the concentration of nano-carbon black in tire-wear particles using emission factors of PM10, PM2.5, and black carbon	Chemosphere	10.1016/j.chemosphere.2022.134976						x	x										x
Kim, J; Wi, E; Moon, H; Son, H; Hong, J; Park, E; Kwon, JT; Seo, D; Lee, H; Kim, Y	2022	Quantitative analysis of the concentration of nano-carbon black originating from tire-wear particles in the road dust	Science of The Total Environment	10.1016/j.scitotenv.2022.156830	x	x	x														x
Kim, J; Yang, SI; Moon, H; Hong, J; Hong, J; Choi, W; Son, H; Lee, BC; Kim, GB; Kim, Y	2021	Potential release of nano-carbon black from tire-wear particles through the weathering effect	Journal of Industrial and Engineering Chemistry	10.1016/j.jiec.2021.01.036	x				x	x											x
Kim, LH; Kang, HM; Bae, W	2010	Treatment of particulates and metals from highway stormwater runoff using zeolite filtration	DESALINATION AND WATER TREATMENT	10.5004/dwt.2010.1901						x		x	x								x
Kipscholl, R; Stocek, R	2022	Degradation of Tires During Intended Usage	Advances in Polymer Science	10.1007/12_2022_132	x			x														x
Klöckner, P; Reemtsma, T; Eisentraut, P; Braun, U; Ruhl, AS; Wagner, S	2019	Tire and road wear particles in road environment - Quantification and assessment of particle dynamics by Zn determination after density separation	Chemosphere	10.1016/j.chemosphere.2019.01.176	x	x	x														x
Klöckner, P; Reemtsma, T; Wagner, S	2020	The diverse metal composition of plastic items and its implications	Science of The Total Environment	10.1016/j.scitotenv.2020.142870	x		x														x
Klöckner, P; Seiwert, B; Eisentraut, P; Braun, U; Reemtsma, T; Wagner, S	2020	Characterization of tire and road wear particles from road runoff indicates highly dynamic particle properties	Water Research	10.1016/j.watres.2020.116262	x	x			x	x	x	x									x
Klöckner, P; Seiwert, B; Wagner, S; Reemtsma, T	2021	Organic Markers of Tire and Road Wear Particles in Sediments and Soils: Transformation Products of Major Antiozonants as Promising Candidates	Environmental Science & Technology	10.1021/acs.est.1c02723	x	x				x	x										x
Klöckner, P; Seiwert, B; Weyrauch, S; Escher, BI; Reemtsma, T; Wagner, S	2021	Comprehensive characterization of tire and road wear particles in highway tunnel road dust by use of size and density fractionation	Chemosphere	10.1016/j.chemosphere.2021.130530	x	x	x			x	x										x
Klun, B; Rozman, U; Kalciková, G	2023	Environmental aging and biodegradation of tire wear microplastics in the aquatic environment	Journal of Environmental Chemical Engineering	10.1016/j.jece.2023.110604	x				x	x		x									x
Klüppel, M	2014	Wear and Abrasion of Tires	Encyclopedia of Polymeric Nanomaterials. Springer Berlin Heidelberg	10.1007/978-3-642-36199-9_312-1	x																	x
Knight, LJ; Parker-Jurd, FNF; Al-Sid-Cheikh, M; Thompson, RC	2020	Tyre wear particles: an abundant yet widely unreported microplastic?	Environmental Science and Pollution Research	10.1007/s11356-020-08187-4	x	x			x												x
Kole, PJ; Löhr, AJ; Van Belleghem, FGAJ; Ragas, AMJ	2017	Wear and Tear of Tyres: A Stealthy Source of Microplastics in the Environment	International Journal of Environmental Research and Public Health	10.3390/ijerph14101265	x		x															x
Kovochich M, Liong M, Parker JA, Oh SC, Lee JP, Xi L, Kreider ML, Unice KM.	2020	Chemical mapping of tire and road wear particles for single particle analysis	Science of The Total Environment	10.1016/j.scitotenv.2020.144085	x	x	x														x
Kovochich, M; Oh, SC; Lee, JP; Parker, JA; Barber, T; Unice, K	2023	Characterization of tire and road wear particles in urban river samples,	Environmental Advances	10.1016/j.envadv.2023.100385	x	x	x														x
Kovochich, M; Parker, JA; Oh, SC; Lee, JP; Wagner, S; Reemtsma, T; Unice, KM	2021	Characterization of Individual Tire and Road Wear Particles in Environmental Road Dust, Tunnel Dust, and Sediment	Environmental Science and Technology Letters	10.1021/acs.estlett.1c00811	x	x	x		x												x
Kreider, ML; Panko, JM; McAtee, BL; Sweet, LI; Finley, BL	2010	Physical and chemical characterization of tire-related particles: Comparison of particles generated using different methodologies	Science of The Total Environment	10.1016/j.scitotenv.2009.10.016	x	x	x	x		x	x										x
Kriit, HK; Sommar, JN; Forsberg, B; Åström, S; Svensson, M; Johansson, C	2021	A health economic assessment of air pollution effects under climate neutral vehicle fleet scenarios in Stockholm, Sweden	Journal of transport and health	10.1016/j.jth.2021.101084	x		x	x												x		x
Kumar, A; Elumalai, SP	2018	Influence of Road Paving on Particulate Matter Emission and Fingerprinting of Elements of Road Dust	Archives of Environmental Contamination and Toxicology	10.1007/s00244-018-0546-6	x			x													x
Kumata, H; Mori, M; Takahashi, S; Takanniya, S; Tsuzuki, M; Uchida, T; Fujiwara, K	2011	Evaluation of Hydrogenated Resin Acids as Molecular Markers for Tire-wear Debris in Urban Environments	Environmental Science & Technology	10.1021/es202156f	x	x				x	x										x
Kumata, H; Sanada, Y; Takada, H; Ueno, T	2000	Historical trends of N-cyclohexyl-2-benzothiazolamine, 2-(4- morpholinyl)benzothiazole, and other anthropogenic contaminants in the urban reservoir sediment core	Environmental Science and Technology	10.1021/es990738k	x	x				x	x										x
Kumata, H; Yamada, J; Masuda, K; Takada, H; Sato, Y; Sakurai, T; Fujiwara, K	2002	Benzothiazolamines as tire-derived molecular markers: Sorptive behavior in street runoff and application to source apportioning	Environmental Science and Technology	10.1021/es0155229	x	x				x	x										x
Kunze, M; Feissel, T; Ivanov, V; Bachmann, T; Hesse, D; Gramstat, S	2022	Analysis of TRWP Particle Distribution in Urban and Suburban Landscapes, Connecting Real Road Measurements with Particle Distribution Simulation	Atmosphere	10.3390/atmos13081204	x	x		x		x	x										x
Kupiainen, KJ; Pirjola, L;	2011	Vehicle non-exhaust emissions from the tyre-road interface - effect of stud properties, traction sanding and resuspension	Atmospheric Environment	10.1016/j.atmosenv.2011.05.027	x			x											x		x
Kwak, J; Lee, S; Lee, S	2014	On-road and laboratory investigations on non-exhaust ultrafine particles from the interaction between the tire and road pavement under braking conditions	Atmospheric Environment	10.1016/j.atmosenv.2014.08.014	x			x		x											x
Kwak, JH; Kim, H; Lee, J; Lee, S	2013	Characterization of non-exhaust coarse and fine particles from on-road driving and laboratory measurements	Science of The Total Environment	10.1016/j.scitotenv.2013.04.040	x		x	x													x
Kwon, EE; Castaldi, MJ	2012	Mechanistic Understanding of Polycyclic Aromatic Hydrocarbons (PAHs) from the Thermal Degradation of Tires under Various Oxygen Concentration Atmospheres	Environmental Science & Technology	10.1021/es303852e										x	x						x
Kwon, EE; Oh, JI; Kim, KH	2015	Polycyclic aromatic hydrocarbons (PAHs) and volatile organic compounds (VOCs) mitigation in the pyrolysis process of waste tires using CO2 as a reaction medium	Journal of Environmental Management	10.1016/j.jenvman.2015.06.033										x	x						x
Lane, RF; Smalling, KL; Bradley, PM; Greer, JB; Gordon, SE; Hansen, JD; Kolpin, DW; Spanjer, AR; Masoner, JR	2024	Tire-derived contaminants 6PPD and 6PPD-Q: Analysis, sample handling, and reconnaissance of United States stream exposures	Chemosphere	10.1016/j.chemosphere.2024.142830						x	x		x								x
Lassen, C; Hansen, SF; Magnusson, K; Hartmann, NB; Rehne Jensen, P; Nielsen, TG; Brinch, A	2015	Microplastics: Occurrence, effects and sources of releases to the environment in Denmark	Danish Environmental Protection Agency		x																	x
Le Maître, O; Süssner, M; Zarak, C	1998	Evaluation of Tire Wear Performance	SAE Technical Paper	10.4271/980256	x		x														x
Lee H, Ju M, Kim Y.	2020	Estimation of emission of tire wear particles (TWPs) in Korea	Waste Management	10.1016/j.wasman.2020.04.037	x				x													x
Lee H, Kim Y.	2018	Treatment characteristics of microplastics at biological sewage treatment facilities in Korea	Mar Pollut Bull	10.1016/j.marpolbul.2018.09.050	x				x												x
Lee, S; Kwak, J; Kim, H; Lee, J	2013	PROPERTIES OF ROADWAY PARTICLES FROM INTERACTION BETWEEN THE TIRE AND ROAD PAVEMENT	International Journal of Automotive Technology	10.1007/s12239-013-0018-y	x		x		x												x
Li C, Zhang Y, Yin S, Wang Q, Li Y, Liu Q, Liu L, Luo X, Chen L, Zheng H, Li F.	2023	First insights into 6PPD-quinone formation from 6PPD photodegradation in water environment	0	10.1016/j.jhazmat.2023.132127						x			x								x
Li K, Kong D, Xiu X, Hao W, Xu D.	2023	Toxic effects of environmentally persistent free radicals (EPFRs) on the surface of tire wear particles on freshwater biofilms: The alleviating role after sewage-incubation-aging	Chemosphere	10.1016/j.chemosphere.2023.140179	x		x														x
Li, B; Quan, ZQ; Bei, SY; Zhang, LC; Mao, HJ	2021	An estimation algorithm for tire wear using intelligent tire concept	0	10.1177/0954407021999483	x			x													x
Li, D; Lei, SJ; Lin, FW; Zhong, L; Ma, WC; Chen, GY	2020	Study of scrap tires pyrolysis-Products distribution and mechanism	Energy	10.1016/j.energy.2020.119038	x	x															x
Li, K; Yu, JH; Chen, XY; Kong, DY; Peng, YH; Xiu, XJ; Su, H; Yan, LK	2022	Effects of tire wear particles with and without photoaging on anaerobic biofilm sulfide production in sewers and related mechanisms	Chemosphere	10.1016/j.chemosphere.2022.136185	x				x	x											x
Li, R; Wang, QQ; He, X; Zhu, SH; Zhang, K; Duan, YS; Fu, QY; Qiao, LP; Wang, YJ; Huang, L; Li, L; Yu, JZ	2020	Source apportionment of PM2.5 in Shanghai based on hourly organic molecular markers and other source tracers	Atmospheric Chemistry and Physics	10.5194/acp-20-12047-2020	x			x	x												x
Li, Y; Shi, T; Li, X; Sun, H; Xia, X; Ji, X; Zhang, J; Liu, M; Lin, Y; Zhang, R; Zheng, Y; Tang, J	2022	Inhaled tire-wear microplastic particles induced pulmonary fibrotic injury via epithelial cytoskeleton rearrangement	Environment International	10.1016/j.envint.2022.107257	x				x												x
Li, Y; Zuo, SG; Lei, L; Yang, XW; Wu, XD	2012	Analysis of impact factors of tire wear	Journal of Vibration and Control	10.1177/1077546311411756	x			x													x
Li, ZM; Kannan, K	2023	Determination of 1,3-Diphenylguanidine, 1,3-Di-o-tolylguanidine, and 1,2,3-Triphenylguanidine in Human Urine Using Liquid Chromatography-Tandem Mass Spectrometry	Environmental Science and Technology	10.1021/acs.est.3c00412						x	x		x								x
Li, ZM; Kannan, K	2024	Mass Loading, Removal, and Emission of 1,3-Diphenylguanidine, Benzotriazole, Benzothiazole, N-(1,3-Dimethylbutyl)-N′-phenyl-p-phenylenediamine, and Their Derivatives in a Wastewater Treatment Plant in New York State, USA	ACS ES and T Water	10.1021/acsestwater.4c00221						x	x		x								x
Li, ZM; Pal, VK; Kannan, P; Li, W; Kannan, K	2023	1,3-Diphenylguanidine, benzothiazole, benzotriazole, and their derivatives in soils collected from northeastern United States	Science of the Total Environment	10.1016/j.scitotenv.2023.164110						x			x								x
Liacos, JW; Kam, W; Delfino, RJ; Schauer, JJ; Sioutas, C	2012	Characterization of organic, metal and trace element PM2.5 species and derivation of freeway-based emission rates in Los Angeles, CA	Science of The Total Environment	10.1016/j.scitotenv.2012.06.106	x	x				x	x										x
Liang, C; Wang, GL; An, DF; Ma, YW	2013	Tread wear and footprint geometrical characters of truck bus radial tires	Chinese Journal of Mechanical Engineering	10.3901/cjme.2013.03.506	x			x													x
Liang, RL; Wang, WJ; Wang, GZ	2021	Research on The Key Influencing Factors of Road Wear for Battery Electric Vehicles tyres	2021 9th International Conference on Traffic and Logistic Engineering (ICTLE)	10.1109/ictle53360.2021.9525633	x		x													x	x
Liang, SS; Shen, PT; Shiue, YL; Chang, YT; Sung, P	2020	Development of a Quantitative Method for Monitoring 2-Mercaptobenzo-thiazole Based on Isotopic Iodoacetamide and Tandem MS	Current Analytical Chemistry	10.2174/1573411015666191114145109						x	x										x
Licher, J; Schmerwitz, F; Soleimani, M; Junker, P	2023	Experimental investigation of the tire wear process using camera-assisted observation assessed by numerical modeling	Tribology International	10.1016/j.triboint.2023.108918	x			x													x
Lin, YS; Wu, MH; Fang, FM; Wu, J; Ma, K	2020	Characteristics and influencing factors of heavy metal pollution in surface dust from driving schools of Wuhu, China	Atmospheric Pollution Research	10.1016/j.apr.2020.11.012	x	x	x	x		x	x		x								x
Liu, JY; Deng, SX; Tong, H; Yang, Y; Tuheti, A	2023	Emission profiles, source identifications, and health risk of polycyclic aromatic hydrocarbons (PAHs) in a road tunnel located in Xi'an, China	Environmental science and pollution research international	10.1007/s11356-023-27996-x						x											x
Liu, MX; Xu, HM; Feng, R; Gu, YX; Bai, YL; Zhang, NN; Wang, QY; Ho, SSH; Qu, LL; Shen, ZX; Cao, JJ	2023	Chemical composition and potential health risks of tire and road wear microplastics from light-duty vehicles in an urban tunnel in China	Environmental Pollution	10.1016/j.envpol.2023.121835	x	x		x	x	x	x										x
Liu, XS; Wang, JM; Gheni, A; ElGawady, MA	2018	Reduced zinc leaching from scrap tire during pavement applications	WASTE MANAGEMENT	10.1016/j.wasman.2018.09.045	x				x	x											x
Liu, Y; Chen, HB; Wu, SJ; Gao, JB; Li, Y; An, ZH; Mao, BH; Tu, R; Li, TZ	2022	Impact of vehicle type, tyre feature and driving behaviour on tyre wear under real-world driving conditions	Science of The Total Environment	10.1016/j.scitotenv.2022.156950	x		x	x														x
Lopez, B; Wang, XL; Chen, LWA; Ma, TY; Mendez-Jimenez, D; Cobb, LC; Frederickson, C; Fang, T; Hwang, B; Shiraiwa, M; Park, M; Park, K; Yao, Q; Yoon, S; Jung, HJ	2023	Metal contents and size distributions of brake and tire wear particles dispersed in the near-road environment	Science of the Total Environment	10.1016/j.scitotenv.2023.163561	x		x	x	x												x
Loubet P, Couturier J, Horta Arduin R, Sonnemann G.	2022	Life cycle inventory of plastics losses from seafood supply chains: Methodology and application to French fish products	Sci Total Environ	10.1016/j.scitotenv.2021.150117	x				x													x
Lu, F; Su, Y; Ji, Y; Ji, R	2021	Release of Zinc and Polycyclic Aromatic Hydrocarbons From Tire Crumb Rubber and Toxicity of Leachate to Daphnia magna: Effects of Tire Source and Photoaging	Bulletin of Environmental Contamination and Toxicology	10.1007/s00128-021-03123-9						x		x									x
Lu, P; Deng, SX; Li, GH; Li, JH; Xu, K; Lu, ZZ	2022	Spatial Distribution of Primary and Secondary PM2.5 Concentrations Emitted by Vehicles in the Guanzhong Plain, China	Atmosphere	10.3390/atmos13020347	x		x		x												x
Lugon, L; Vigneron, J; Debert, C; Chrétien, O; Sartelet, K	2021	Black carbon modeling in urban areas: investigating the influence of resuspension and non-exhaust emissions in streets using the Street-in-Grid model for inert particles (SinG-inert)	Geoscientific Model Development	10.5194/gmd-14-7001-2021	x				x													x
Luo, J; He, WX; Wu, J; Gu, XS; Ye, L	2019	Trace Elements and Polycyclic Aromatic Hydrocarbons Variation Along the Guang-Shen Expressway Before and After the 2016 Qingming Festival in Guangzhou	Archives of Environmental Contamination and Toxicology	10.1007/s00244-018-0582-2						x											x
Luo, ZX; Zhou, XY; Su, Y; Wang, HM; Yu, RL; Zhou, SF; Xu, EG; Xing, BS	2021	Environmental occurrence, fate, impact, and potential solution of tire microplastics: Similarities and differences with tire wear particles	Science of The Total Environment	10.1016/j.scitotenv.2021.148902	x		x	x	x													x
Ma, B; Xu, HG; Chen, Y; Lin, MY	2017	Evaluating the tire wear quantity and differences based on vehicle and road coupling method	Advances in Mechanical Engineering	10.1177/1687814017700063	x			x													x
Maga, D; Galafton, C; Blömer, J; Thonemann, N; Özdamar, A; Bertling, J	2022	Methodology to address potential impacts of plastic emissions in life cycle assessment	INTERNATIONAL JOURNAL OF LIFE CYCLE ASSESSMENT	10.1007/s11367-022-02040-1	x		x		x													x
Manev, N; Dimitrovski, D; Nikolov, E; Petreski, D; Markov, Z; Iliev, V	2021	EVALUATION OF THE AIR POLLUTION IMPACT OF HEAVY GOODS, DIESEL DRIVEN VEHICLES, ALONG THE Al HIGHWAY IN NORTH MACEDONIA	International Journal of Ecosystems and Ecology Science (IJEES)	10.31407/ijees11.426	x			x														x
Marchut-Mikolajczyk, O; Drozdzynski, P; Januszewicz, B; Domanski, J; Wrzesniewska-Tosik, K	2019	Degradation of ozonized tire rubber by aniline - Degrading Candida methanosorbosa BP6 strain	Journal of Hazardous Materials	10.1016/j.jhazmat.2018.12.045	x				x												x
Markiewicz, A; Björklund, K; Eriksson, E; Kalmykova, Y; Strömvall, AM; Siopi, A	2017	Emissions of organic pollutants from traffic and roads: Priority pollutants selection and substance flow analysis	Science of The Total Environment	10.1016/j.scitotenv.2016.12.074						x		x	x								x
Markiewicz, A; Strömvall, AM; Björklund, K; Eriksson, E	2019	Generation of nano- and micro-sized organic pollutant emulsions in simulated road runoff	Environment International	10.1016/j.envint.2019.105140						x											x
Materić D, Kjær HA, Vallelonga P, Tison JL, Röckmann T, Holzinger R.	2022	Nanoplastics measurements in Northern and Southern polar ice	Environmental Research	10.1016/j.envres.2022.112741	x	x			x												x
Mathissen, M; Scheer, V; Vogt, R; Benter, T	2011	Investigation on the potential generation of ultrafine particles from the tire-road interface	Atmospheric Environment	10.1016/j.atmosenv.2011.08.032	x		x	x													x
Mattonai, M; Nacci, T; Modugno, F	2022	Analytical strategies for the quali-quantitation of tire and road wear particles-A critical review	Trends in Analytical Chemistry	10.1016/j.trac.2022.116650	x	x																x
Mattsson, K; da Silva, VH; Deonarine, A; Louie, SM; Gondikas, A	2021	Monitoring anthropogenic particles in the environment: Recent developments and remaining challenges at the forefront of analytical methods	Current Opinion in Colloid and Interface Science	10.1016/j.cocis.2021.101513	x	x															x
Mattsson, K; de Lima, JA; Wilkinson, T; Järlskog, I; Ekstrand, E; Sköld, YA; Gustafsson, M; Hassellöv, M	2023	Tyre and road wear particles from source to sea	Microplastics and Nanoplastics	10.1186/s43591-023-00060-8	x		x														x
McIntyre JK, Spromberg J, Cameron J, Incardona JP, Davis JW, Scholz NL.	2023	Bioretention filtration prevents acute mortality and reduces chronic toxicity for early life stage coho salmon (Oncorhynchus kisutch) episodically exposed to urban stormwater runoff	Sci Total Environ	10.1016/j.scitotenv.2023.165759						x			x								x
McKenzie, ER; Money, JE; Green, PG; Young, TM	2009	Metals associated with stormwater-relevant brake and tire samples	Science of The Total Environment	10.1016/j.scitotenv.2009.07.018						x	x										x
Meegoda JN, Hettiarachchi MC.	2023	A Path to a Reduction in Micro and Nanoplastics Pollution	International Journal of Environmental Research and Public Health	10.3390/ijerph20085555	x				x													x
Meena, KK; Arief, I; Ghosh, AK; Liebscher, H; Hait, S; Nagel, J; Heinrich, G; Fery, A; Das, A	2023	3D-printed stretchable hybrid piezoelectric-triboelectric nanogenerator for smart tire: Onboard real-time tread wear monitoring system	Nano Energy	10.1016/j.nanoen.2023.108707	x		x														x
Meland, S; Granheim, GM; Rundberget, JT; Rødland, E	2024	Screening of Tire-Derived Chemicals and Tire Wear Particles in a Road Tunnel Wash Water Treatment Basin	Environmental Science and Technology Letters	10.1021/acs.estlett.3c00811	x				x	x		x	x								x
Mengistu D, Nilsen V, Heistad A, Kvaal K.	2019	Detection and Quantification of Tire Particles in Sediments Using a Combination of Simultaneous Thermal Analysis, Fourier Transform Infra-Red, and Parallel Factor Analysis	International Journal of Environmental Research and Public Health	10.3390/ijerph16183444	x	x															x
Mengistu, D; Coutris, C; Paus, KAH; Heistad, A	2022	Concentrations and Retention Efficiency of Tire Wear Particles from Road Runoff in Bioretention Cells	WATER	10.3390/w14203233	x				x												x
Mengistu, D; Nilsen, V; Coutris, C; Amdal, HM; Heistad, A	2022	Microplastics Concentrations in Soil Along a Racetrack	Water, Air and Soil Pollution	10.1007/s11270-022-06008-7	x			x	x												x
Mennekes, D; Nowack, B	2022	Tire wear particle emissions: Measurement data where are you?	Science of The Total Environment	10.1016/j.scitotenv.2022.154655	x				x													x
Mian HR, Chhipi-Shrestha G, McCarty K, Hewage K, Sadiq R.	2022	An estimation of tire and road wear particles emissions in surface water based on a conceptual framework	Science of The Total Environment	10.1016/j.scitotenv.2022.157760	x			x	x													x
Miech, J.A., Aker, S., Zhang, Z., Ozer, H., Fraser, M.P., Herckes, P	2024	Tire Wear Emissions by Highways: Impact of Season and Surface Type	Atmosphere	10.3390/atmos15091122	x	x	x	x													x
Miller, JV; Chan, K; Unice, K	2022	Evaluation of three pyrolyzer technologies for quantitative pyrolysis-gas chromatography-mass spectrometry (Py-GC-MS) of tire tread polymer in an artificial sediment matrix	Environmental advances	10.1016/j.envadv.2022.100213	x	x															x
Miller, JV; Maskrey, JR; Chan, K; Unice, K	2021	Pyrolysis-Gas Chromatography-Mass Spectrometry (Py-GC-MS) Quantification of Tire and Road Wear Particles (TRWP) in Environmental Matrices: Assessing the Importance of Microstructure in Instrument Calibration Protocols	Analytical Letters	10.1080/00032719.2021.1979994	x	x															x
Mitchell CJ, Jayakaran AD.	2023	Mitigating tire wear particles and tire additive chemicals in stormwater with permeable pavements	Sci Total Environ	10.1016/j.scitotenv.2023.168236	x	x			x	x	x		x								x
Molazadeh, MS; Liu, F; Lykkemark, J; lordachescu, L; Nielsen, AH; Vollertsen, J	2023	What is hiding below the surface – MPs including TWP in an urban lake	Environment International	10.1016/j.envint.2023.108282	x	x			x												x
Monaghan, J; Jaeger, A; Agua, AR; Stanton, RS; Pirrung, M; Gill, CG; Krogh, ET	2021	A Direct Mass Spectrometry Method for the Rapid Analysis of Ubiquitous Tire-Derived Toxin N-(1,3-Dimethylbutyl)-N′-phenyl-p-phenylenediamine Quinone (6-PPDQ)	Environmental Science and Technology Letters	10.1021/acs.estlett.1c00794						x	x										x
Monaghan, J; Jaeger, A; Jai, JK; Tomlin, H; Atkinson, J; Brown, TM; Gill, CG; Krogh, ET	2023	Automated, High-Throughput Analysis of Tire-Derived p-Phenylenediamine Quinones (PPDQs) in Water by Online Membrane Sampling Coupled to MS/MS	ACS ES&amp;T Water	10.1021/acsestwater.3c00275						x	x										x
More SL, Miller JV, Thornton SA, Chan K, Barber TR, Unice KM.	2023	Refinement of a microfurnace pyrolysis-GC-MS method for quantification of tire and road wear particles (TRWP) in sediment and solid matrices	Science of the Total Environment	10.1016/j.scitotenv.2023.162305	x	x															x
Moskovchenko, DV; Pozhitkov, RY; Minkina, TM; Sushkova, SN	2022	Trace Metals and Polycyclic Aromatic Hydrocarbons in the Snow Cover of the City of Nizhnevartovsk (Western Siberia, Russia)	Archives of Environmental Contamination and Toxicology	10.1007/s00244-022-00974-z						x			x								x
Müller, A; Kocher, B; Altmann, K; Braun, U	2022	Determination of tire wear markers in soil samples and their distribution in a roadside soil	Chemosphere	10.1016/j.chemosphere.2022.133653	x	x			x												x
Müller, K; Hübner, D; Huppertsberg, S; Knepper, TP; Zahn, D	2022	Probing the chemical complexity of tires: Identification of potential tire-borne water contaminants with high-resolution mass spectrometry	Science of The Total Environment	10.1016/j.scitotenv.2021.149799						x											x
Mummullage, S; Egodawatta, P; Ayoko, GA; Goonetilleke, A	2016	Use of physicochemical signatures to assess the sources of metals in urban road dust	Science of The Total Environment	10.1016/j.scitotenv.2015.10.032						x											x
Mun, S; Chong, H; Lee, J; Lim, Y	2022	Characteristics of Real-World Non-Exhaust Particulates from Vehicles	Energies	10.3390/en16010177	x	x				x	x										x
Murawski, A; Schmied-Tobies, MIH; Schwedler, G; Rucic, E; Gries, W; Schmidtkunz, C; Küpper, K; Leng, G; Conrad, A; Kolossa-Gehring, M	2020	2-Mercaptobenzothiazole in urine of children and adolescents in Germany – Human biomonitoring results of the German Environmental Survey 2014–2017 (GerES V)	International Journal of Hygiene and Environmental Health	10.1016/j.ijheh.2020.113540						x	x		x								x
Natori, S; Fujiwara, M; Kurisu, M; Tanimizu, M; Iizuka, T; Takahashi, Y	2022	Speciation and isotopic analysis of zinc in size-fractionated aerosol samples related to its source and chemical processes	Atmospheric Environment	10.1016/j.atmosenv.2022.119504	x		x		x												x
Nguyen, TC; Loganathan, P; Nguyen, TV; Pham, TTN; Kandasamy, J; Wu, M; Naidu, R; Vigneswaran, S	2015	Trace elements in road-deposited and waterbed sediments in Kogarah Bay, Sydney: enrichment, sources and fractionation	Soil Research	10.1071/sr14163						x			x								x
Nielsen, AF; Polesel, F; Ahonen, T; Palmqvist, A; Baun, A; Hartmann, NB	2023	Assessing the Biodegradability of Tire Tread Particles and Influencing Factors	Environmental Toxicology and Chemistry	10.1002/etc.5757	x	x			x	x	x	x									x
Nishimagi, C; Yanagihara, M; Fang, YM; Sakai, H	2023	Occurrence of tire-derived microplastics (TMPs) focusing on driving behavior	H2Open Journal	10.2166/h2oj.2023.058	x	x	x	x													x
Nitzsche, KN; Yoshimura, T; Ishikawa, NF; Kajita, H; Kawahata, H; Ogawa, NO; Suzuki, K; Yokoyama, Y; Ohkouchi, N	2022	Metal contamination in a sediment core from Osaka Bay during the last 400 years	Progress in Earth and Planetary Science	10.1186/s40645-022-00517-z	x				x												x
Nolasco, ME; Lemos, VAS; López, G; Soares, SA; Feitosa, JPM; Araújo, BS; Ayala, AP; de Azevedo, MMF; Santos, FEP; Cavalcante, RM	2022	Morphology, Chemical Characterization and Sources of Microplastics in a Coastal City in the Equatorial Zone with Diverse Anthropogenic Activities (Fortaleza city, Brazil)	Journal of Polymers and The Environment	10.1007/s10924-022-02405-5	x	x	x		x												x
Oakes, MM; Burke, JM; Norris, GA; Kovalcik, KD; Pancras, JP; Landis, MS	2016	Near-road enhancement and solubility of fine and coarse particulate matter trace elements near a major interstate in Detroit, Michigan	Atmospheric Environment	10.1016/j.atmosenv.2016.09.034	x				x												x
Obermaier, N; Pistocchi, A	2022	A Preliminary European-Scale Assessment of Microplastics in Urban Wastewater	Frontiers in Environmental Science	10.3389/fenvs.2022.912323	x				x													x
O'Brien, AM; Lins, TF; Yang, YM; Frederickson, ME; Sinton, D; Rochman, CM	2022	Microplastics shift impacts of climate change on a plant-microbe mutualism: Temperature, CO2, and tire wear particles	Environmental Research	10.1016/j.envres.2021.111727						x			x								x
O'Loughlin, DP; Haugen, MJ; Day, J; Brown, AS; Braysher, EC; Molden, N; Willis, AE; MacFarlane, M; Boies, AM	2023	Multi-element analysis of tyre rubber for metal tracers	Environment International	10.1016/j.envint.2023.108047	x	x				x	x										x
Olubusoye BS, Cizdziel JV, Bee M, Moore MT, Pineda M, Yargeau V, Bennett ER.	2023	Toxic Tire Wear Compounds (6PPD-Q and 4-ADPA) Detected in Airborne Particulate Matter Along a Highway in Mississippi, USA	Bulletin of Environmental Contamination and Toxicology	10.1007/s00128-023-03820-7	x		x		x	x											x
Ono, K; Naito, W; Ogura, I; Xue, MQ; Kato, E; Uesaka, M; Tsunemi, K	2023	Estimation of microplastic emission and transfer into Tokyo Bay, Japan, using material flow analysis	Marine Pollution Bulletin	10.1016/j.marpolbul.2023.115440	x				x												x
Oroumiyeh, F; Zhu, YF	2021	Brake and tire particles measured from on-road vehicles: Effects of vehicle mass and braking intensity	0	10.1016/j.aeaoa.2021.100121	x			x												x	x
O'Shea, MJ; Vann, DR; Hwang, WT; Gieré, R	2020	A mineralogical and chemical investigation of road dust in Philadelphia, PA, USA	Environmental Science and Pollution Research	10.1007/s11356-019-06746-y						x		x									x
Österlund H, Blecken G, Lange K, Marsalek J, Gopinath K, Viklander M.	2022	Microplastics in urban catchments: Review of sources, pathways, and entry into stormwater	Science of The Total Environment	10.1016/j.scitotenv.2022.159781	x				x													x
Oyama, BS; Andrade, MD; Herckes, P; Dusek, U; Röckmann, T; Holzinger, R	2016	Chemical characterization of organic particulate matter from on-road traffic in Sao Paulo, Brazil	Atmospheric Chemistry and Physics	10.5194/acp-16-14397-2016	x	x															x
Pacheco, MT; Parmigiani, MM; Andrade, MD; Morawska, L; Kumar, P	2017	A review of emissions and concentrations of particulate matter in the three major metropolitan areas of Brazil	Journal of transport and health	10.1016/j.jth.2017.01.008	x			x												x		x
Padoan, E; Ajmone-Marsan, F; Querol, X; Amato, F	2017	An empirical model to predict road dust emissions based on pavement and traffic characteristics	Environmental Pollution	10.1016/j.envpol.2017.10.115	x		x	x											x		x
Padovan, J; Padovan, P	1994	MODELING WEAR AT INTERMITTENTLY SLIPPING HIGH-SPEED INTERFACES	Computers & Structures	10.1016/0045-7949(94)90361-1	x		x	x													x
Pan, SH; Sun, YL; Zhang, G; Li, J; Xie, QL; Chaktaborty, P	2012	Assessment of 2-(4-morpholinyl) benzothiazole (24MoBT) and N-cyclohexyl-2-benzothiazolamine (NCBA) as traffic tracers in metropolitan cities of China and India	Atmospheric Environment	10.1016/j.atmosenv.2012.03.029	x	x				x	x	x	x								x
Panko, J; Kreider, M; Unice, K	2018	Review of Tire Wear Emissions	Non-Exhaust Emissions	10.1016/B978-0-12-811770-5.00007-8	x		x															x
Panko, JM; Chu, J; Kreider, ML; Unice, KM	2013	Measurement of airborne concentrations of tire and road wear particles in urban and rural areas of France, Japan, and the United States	Atmospheric Environment	10.1016/j.atmosenv.2013.01.040	x				x												x
Panko, JM; Hitchcock, KM; Fuller, GW; Green, D	2019	Evaluation of Tire Wear Contribution to PM2.5 in Urban Environments	Atmosphere	10.3390/atmos10020099	x	x		x													x
Pant, P; Baker, SJ; Shukla, A; Maikawa, C; Pollitt, KJG; Harrison, RM	2015	The PM10 fraction of road dust in the UK and India: Characterization, source profiles and oxidative potential	Science of The Total Environment	10.1016/j.scitotenv.2015.05.084	x		x		x												x
Pant, P; Harrison, RM	2013	Estimation of the contribution of road traffic emissions to particulate matter concentrations from field measurements: A review	Atmospheric Environment	10.1016/j.atmosenv.2013.04.028	x	x																x
Park, I; Kim, H; Lee, S	2018	Characteristics of tire wear particles generated in a laboratory simulation of tire/road contact conditions	Journal of Aerosol Science	10.1016/j.jaerosci.2018.07.005	x	x	x	x													x
Park, I; Lee, J; Lee, S	2017	Laboratory study of the generation of nanoparticles from tire tread	Aerosol Science and Technology	10.1080/02786826.2016.1248757	x		x		x												x
Park, JM; Lee, TJ; Kim, DS	2022	Improving PMF source reconciliation with cluster analysis for PM2.5 hourly data from Seoul, Korea	Atmospheric Pollution Research	10.1016/j.apr.2022.101398	x	x				x	x											x
Parker, BW; Beckingham, BA; Ingram, BC; Ballenger, JC; Weinstein, JE; Sancho, G	2020	Microplastic and tire wear particle occurrence in fishes from an urban estuary: Influence of feeding characteristics on exposure risk	Marine Pollution Bulletin	10.1016/j.marpolbul.2020.111539	x				x												x
Parker-Jurd, FNF; Napper, IE; Abbott, GD; Hann, S; Thompson, RC	2021	Quantifying the release of tyre wear particles to the marine environment via multiple pathways	Marine Pollution Bulletin	10.1016/j.marpolbul.2021.112897	x	x			x												x
Pellecchia, M; Papa, G; Barbato, M; Capitani, G; Negri, I	2023	Origin of non-exhaust PM in cities by individual analysis of particles collected by honey bees (Apis mellifera)	Environmental Pollution	10.1016/j.envpol.2023.121885	x	x			x												x
Peter, KT; Gilbreath, A; Gonzalez, M; Tian, Z; Wong, A; Yee, D; Miller, EL; Avellaneda, PM; Chen, D; Patterson, A; Fitzgerald, N; Higgins, CP; Kolodziej, EP; Sutton, R	2024	Storms mobilize organophosphate esters, bisphenols, PFASs, and vehicle-derived contaminants to San Francisco Bay watersheds	Environmental Science: Processes and Impacts	10.1039/d4em00117f						x			x								x
Peter, KT; Hou, F; Tian, ZY; Wu, C; Goehring, M; Liu, FM; Kolodziej, EP	2020	More Than a First Flush: Urban Creek Storm Hydrographs Demonstrate Broad Contaminant Pollutographs	Environmental Science & Technology	10.1021/acs.est.0c00872						x		x	x								x
Peter, KT; Tian, Z; Wu, C; Lin, P; White, S; Du, B; McIntyre, JK; Scholz, NL; Kolodziej, EP	2018	Using High-Resolution Mass Spectrometry to Identify Organic Contaminants Linked to Urban Stormwater Mortality Syndrome in Coho Salmon	Environmental Science & Technology	10.1021/acs.est.8b03287						x	x										x
Petrucci G, Gromaire MC, Shorshani MF, Chebbo G.	2014	Nonpoint source pollution of urban stormwater runoff: a methodology for source analysis	Environmental Science and Pollution Research	10.1007/s11356-014-2845-4						x	x											x
Pierson, WR; Brachaczek, WW	1974	Airborne Particulate Debris from Rubber Tires	Rubber Chemistry and Technology	10.5254/1.3540499	x		x		x												x
Pikridas, M; Vrekoussis, M; Sciare, J; Kleanthous, S; Vasiliadou, E; Kizas, C; Savvides, C; Mihalopoulos, N	2018	Spatial and temporal (short and long-term) variability of submicron, fine and sub-10 μm particulate matter (PM1, PM2.5, PM10) in Cyprus	Atmospheric Environment	10.1016/j.atmosenv.2018.07.048	x		x		x												x
Pilková, Z; Hiller, E; Filová, L; Jurkovic, L	2021	Sixteen priority polycyclic aromatic hydrocarbons in roadside soils at traffic light intersections (Bratislava, Slovakia): concentrations, sources and influencing factors	Environmental Geochemistry and Health	10.1007/s10653-021-01122-7	x		x		x												x
Pirjola L, Johansson C, Kupiainen K, Stojiljkovic A, Karlsson H, Hussein T.	2010	Road dust emissions from paved roads measured using different mobile systems	Journal of The Air & Waste Management Association	10.3155/1047-3289.60.12.1422	x	x															x
Piscitello, A; Bianco, C; Casasso, A; Sethi, R	2021	Non-exhaust traffic emissions: Sources, characterization, and mitigation measures	Science of The Total Environment	10.1016/j.scitotenv.2020.144440	x	x														x		x
Polukarova, M; Hjort, M; Gustafsson, M	2024	Comprehensive approach to national tire wear emissions: Challenges and implications	Science of The Total Environment	10.1016/J.SCITOTENV.2024.171391	x				x											x		x
Polukarova, M; Markiewicz, A; Björklund, K; Strömvall, AM; Galfi, H; Sköld, YA; Gustafsson, M; Järlskog, I; Aronsson, M	2020	Organic pollutants, nano- and microparticles in street sweeping road dust and washwater	Environment International	10.1016/j.envint.2019.105337	x				x	x			x								x
Praticò, FG; Briante, PG	2020	Particulate Matter from Non-exhaust Sources	0	10.3846/enviro.2020.622	x		x															x
Prenner, S; Allesch, A; Staudner, M; Rexeis, M; Schwingshackl, M; Huber-Humer, M; Part, F	2021	Static modelling of the material flows of micro- and nanoplastic particles caused by the use of vehicle tyres	Environmental Pollution	10.1016/j.envpol.2021.118102	x		x		x													x
Querol, X; Viana, M; Alastuey, A; Amato, F; Moreno, T; Castillo, S; Pey, J; de la Rosa, J; de la Campa, AS; Artíñano, B; Salvador, P; Dos Santos, SG; Fernández-Patier, R; Moreno-Grau, S; Negral, L; Minguillón, MC; Monfort, E; Gil, JI; Inza, A; Ortega, LA; Santamaría, JM; Zabalza, J	2007	Source origin of trace elements in PM from regional background, urban and industrial sites of Spain	Atmospheric Environment	10.1016/j.atmosenv.2007.05.022	x		x		x												x
Quiñonez-Plaza, A; Wakida, FT; Temores-Peña, J; Rodriguez-Mendivil, DD; Garcia-Flores, E; Pastrana-Corral, MA; Melendez-Lopez, SG	2017	Total petroleum hydrocarbons and heavy metals in road-deposited sediments in Tijuana, Mexico	Journal of Soils and Sediments	10.1007/s11368-017-1778-1	x		x		x												x
Radrizzani, S; Panzani, G; Savaresi, SM	2023	A tyre wear modelling approach for vehicle dynamics simulation and control-oriented analyses with application to motorcycles	Vehicle System Dynamics	10.1080/00423114.2023.2232057	x			x													x
Raparthi, N; Phuleria, HC	2022	On-road vehicular emission characterization from the road-tunnel measurements in India: Morphology, emission factors, and sources	Environmental Research	10.1016/j.envres.2022.114295						x											x
Rauert C, Charlton N, Okoffo ED, Stanton RS, Agua AR, Pirrung MC, Thomas KV.	2022	Concentrations of Tire Additive Chemicals and Tire Road Wear Particles in an Australian Urban Tributary	Environmental Science & Technology	10.1021/acs.est.1c07451	x	x			x	x	x		x								x
Rauert C, Vardy S, Daniell B, Charlton N, Thomas KV.	2022	Tyre additive chemicals, tyre road wear particles and high production polymers in surface water at 5 urban centres in Queensland, Australia	Science of The Total Environment	10.1016/j.scitotenv.2022.158468						x			x								x
Rauert, C; Kaserzon, SL; Veal, C; Yeh, RY; Mueller, JF; Thomas, KV	2020	The first environmental assessment of hexa(methoxymethyl)melamine and co-occurring cyclic amines in Australian waterways	Science of The Total Environment	10.1016/j.scitotenv.2020.140834						x		x									x
Rausch, J; Jaramillo-Vogel, D; Perseguers, S; Schnidrig, N; Grobéty, B; Yajan, P	2021	Automated identification and quantification of tire wear particles (TWP) in airborne dust: SEM/EDX single particle analysis coupled to a machine learning classifier	Science of The Total Environment	10.1016/j.scitotenv.2021.149832	x	x	x		x												x
Reid, S; Bai, S; Du, Y; Craig, K; Erdakos, G; Baringer, L; Eisinger, D; McCarthy, M; Landsberg, K	2016	Emissions Modeling with MOVES and EMFAC to Assess the Potential for a Transportation Project to Create Particulate Matter Hot Spots	Transportation Research Record	10.3141/2570-02	x			x														x
Ren, Y; Li, W; Jia, Q; Zhao, Y; Qu, C; Liu, L; Liu, J; Wu, C	2024	Separation and quantification of tire and road wear particles in road dust samples: Bonded-sulfur as a novel marker	Journal of Hazardous Materials	10.1016/j.jhazmat.2023.133089	x	x															x
Requia, WJ; Arain, A; Koutrakis, P; Dalumpines, R	2018	Assessing particulate matter emissions from future electric mobility and potential risk for human health in Canadian metropolitan area	Air Quality, Atmosphere & Health	10.1007/s11869-018-0608-y	x															x	x
Revitt, DM; Ellis, JB; Gilbert, N; Bryden, J; Lundy, L	2022	Development and application of an innovative approach to predicting pollutant concentrations in highway runoff	Science of The Total Environment	10.1016/j.scitotenv.2022.153815	x			x	x	x										x		x
Rhodes, EP; Ren, ZY; Mays, DC	2012	Zinc Leaching from Tire Crumb Rubber	Environmental Science & Technology	10.1021/es3024379						x		x									x
Rienda, IC; Alves, CA	2021	Road dust resuspension: A review	Atmospheric Research	10.1016/j.atmosres.2021.105740	x				x													x
Rodgers TFM, Wang Y, Humes C, Jeronimo M, Johannessen C, Spraakman S, Giang A, Scholes RC.	2023	Bioretention Cells Provide a 10-Fold Reduction in 6PPD-Quinone Mass Loadings to Receiving Waters: Evidence from a Field Experiment and Modeling	Environ Sci Technol Lett	10.1021/acs.estlett.3c00203						x			x								x
Rødland, ES; Binda, G; Spanu, D; Carnati, S; Bjerke, LR; Nizzetto, L	2024	Are eco-friendly “green” tires also chemically green? Comparing metals, rubbers and selected organic compounds in green and conventional tires	Journal of Hazardous Materials	10.1016/J.JHAZMAT.2024.135042						x		x									x
Rødland, ES; Gustafsson, M; Jaramillo-Vogel, D; Järlskog, I; Müller, K; Rauert, C; Rausch, J; Wagner, S	2023	Analytical challenges and possibilities for the quantification of tire- road wear particles	Trends in Analytical Chemistry (TrAC)	10.1016/j.trac.2023.117121	x	x				x	x											x
Rødland, ES; Heier, LS; Lind, OC; Meland, S	2023	High levels of tire wear particles in soils along low traffic roads	Science of the Total Environment	10.1016/j.scitotenv.2023.166470	x	x		x													x
Rødland, ES; Lind, OC; Reid, M; Heier, LS; Skogsberg, E; Snilsberg, B; Gryteselv, D; Meland, S	2022	Characterization of tire and road wear microplastic particle contamination in a road tunnel: From surface to release	Journal of Hazardous Materials	10.1016/j.jhazmat.2022.129032	x	x			x												x
Rødland, ES; Okoffo, ED; Rauert, C; Heier, LS; Lind, OC; Reid, M; Thomas, KV; Meland, S	2020	Road de-icing salt: Assessment of a potential new source and pathway of microplastics particles from roads	Science of The Total Environment	10.1016/j.scitotenv.2020.139352	x				x													x
Rødland, ES; Samanipour, S; Rauert, C; Okoffo, ED; Reid, MJ; Heier, LS; Lind, OC; Thomas, KV; Meland, S	2022	A novel method for the quantification of tire and polymer-modified bitumen particles in environmental samples by pyrolysis gas chromatography mass spectroscopy	Journal of Hazardous Materials	10.1016/j.jhazmat.2021.127092	x	x			x												x
Rogge, WF; Medeiros, PM; Simoneit, BRT	2012	Organic Compounds in Dust from Rural and Urban Paved and Unpaved Roads Taken During the San Joaquin Valley Fugitive Dust Characterization Study	Environmental Engineering Science	10.1089/ees.2010.0124						x											x
Rommel, SH; Noceti, L; Stinshoff, P; Helmreich, B	2020	Leaching potential of heavy metals from road-deposited sediment and sorptive media during dry periods in storm water quality improvement devices	ENVIRONMENTAL SCIENCE-WATER RESEARCH & TECHNOLOGY	10.1039/d0ew00351d						x		x	x								x
Ross, MS; Loutan, A; Groeneveld, T; Molenaar, D; Kroetch, K; Bujaczek, T; Kolter, S; Moon, S; Huynh, A; Khayam, R; Franczak, BC; Camm, E; Arnold, VI; Ruecker, NJ	2023	Estimated discharge of microplastics via urban stormwater during individual rain events	Frontiers in Environmental Science	10.3389/fenvs.2023.1090267	x				x												x
Rosso, B; Corami, F; Vezzaro, L; Biondi, S; Bravo, B; Barbante, C; Gambaro, A	2022	Quantification and characterization of additives, plasticizers, and small microplastics (5-100?m) in highway stormwater runoff	Journal of Environmental Management	10.1016/j.jenvman.2022.116348						x											x
Rosso, B; Gregoris, E; Litti, L; Zorzi, F; Fiorini, M; Bravo, B; Barbante, C; Gambaro, A; Corami, F	2023	Identification and quantification of tire wear particles by employing different cross-validation techniques: FTIR-ATR Micro-FTIR, Pyr-GC/MS, and SEM	Environmental Pollution	10.1016/j.envpol.2023.121511	x	x															x
Roubeau Dumont E, Gao X, Zheng J, Macairan J, Hernandez LM, Baesu A, Bayen S, Robinson SA, Ghoshal S, Tufenkji N.	2023	Unraveling the toxicity of tire wear contamination in three freshwater species: From chemical mixture to nanoparticles	J Hazard Mater	10.1016/j.jhazmat.2023.131402						x											x
Roychand, R; Pramanik, BK	2020	Identification of micro-plastics in Australian road dust	Journal of environmental chemical engineering	10.1016/j.jece.2019.103647	x	x															x
Rozman, U; Turk, T; Skalar, T; Zupancic, M; Korosin, NC; Marinsek, M; Olivero-Verbel, J; Kalcíková, G	2021	An extensive characterization of various environmentally relevant microplastics - Material properties, leaching and ecotoxicity testing	Science of The Total Environment	10.1016/j.scitotenv.2021.145576	x		x			x											x
Sadiktsis, I; Bergvall, C; Johansson, C; Westerholm, R	2012	Automobile Tires-A Potential Source of Highly Carcinogenic Dibenzopyrenes to the Environment	Environmental Science & Technology	10.1021/es204257d						x	x										x
Saifur S, Gardner CM.	2023	Evaluation of stormwater microbiomes for the potential biodegradation of tire wear particle contaminants	Journal of Applied Microbiology	10.1093/jambio/lxad086						x			x								x
Saifur, S; Gardner, CM	2021	Loading, transport, and treatment of emerging chemical and biological contaminants of concern in stormwater	Water Science and Technology	10.2166/wst.2021.187	x				x	x			x									x
Saladin, S; Boies, A; Giorio C	2024	Airborne Tire Wear Particles: A Critical Reanalysis of the Literature Reveals Emission Factors Lower than Expected	Environmental Science & Technology Letters	10.1021/acs.estlett.4c00792	x		x															x
Samanta, P; Dey, S; Kundu, D; Dutta, D; Jambulkar, R; Mishra, R; Ghosh, AR; Kumar, S	2022	An insight on sampling, identification, quantification and characteristics of microplastics in solid wastes	Trends in Environmental Analytical Chemistry	10.1016/j.teac.2022.e00181	x	x			x													x
Samesová, D; Ponist, J; Hybská, H; Pochyba, A; Schwarz, M; Salva, J	2023	Determination of aerobic and anaerobic biological degradability of waste tyres	Environmental Sciences Europe	10.1186/s12302-023-00723-6	x				x												x
Sarasa, J; Llabrés, T; Ormad, P; Mosteo, R; Ovelleiro, JL	2006	Characterization and photo-Fenton treatment of used tires leachate	JOURNAL OF HAZARDOUS MATERIALS	10.1016/j.jhazmat.2006.01.023						x		x	x								x
Sarica, T; Sartelet, K; Roustan, Y; Kim, Y; Lugon, L; Marques, B; D'Anna, B; Chaillou, C; Larrieu, C	2023	Sensitivity of pollutant concentrations in urban streets to asphalt and traffic-related emissions	Environmental Pollution	10.1016/j.envpol.2023.121955	x		x							x							x
Scerri MM, Weinbruch S, Delmaire G, Mercieca N, Nolle M, Prati P, Massabò D.	2023	Exhaust and non-exhaust contributions from road transport to PM(10) at a Southern European traffic site	Environmental Pollution	10.1016/j.envpol.2022.120569	x				x												x
Schläfle, S; Unrau, HJ; Gauterin, F	2023	Influence of Load Condition, Tire Type, and Ambient Temperature on the Emission of Tire-Road Particulate Matter	Atmosphere	10.3390/atmos14071095	x		x	x											x		x
Schläfle, S; Zhang, M; Unrau, HJ; Gauterin, F	2024	Influence of Vertical Load, Inflation Pressure, and Driving Speed on the Emission of Tire–Road Particulate Matter and Its Size Distribution	Atmosphere	10.3390/atmos15040502	x			x													x
Schmerwitz, F; Wieting, S; Aschenbrenner, N; Topp, A; Wies, B	2022	Characterization of Tire Road Wear Particles in the Field and at Laboratory Scale	Proceedings	10.1007/978-3-662-64550-5_41	x	x	x	x													x
Schmid, C; Cozzarini, L; Zambello, E	2020	Microplastic's story	Marine Pollution Bulletin	10.1016/j.marpolbul.2020.111820	x				x													x
Seiwert B, Nihemaiti M, Troussier M, Weyrauch S, Reemtsma T.	2022	Abiotic oxidative transformation of 6-PPD and 6-PPD quinone from tires and occurrence of their products in snow from urban roads and in municipal wastewater	Water Research	10.1016/j.watres.2022.118122						x			x								x
Seiwert, B; Klöckner, P; Wagner, S; Reemtsma, T	2020	Source-related smart suspect screening in the aqueous environment: search for tire-derived persistent and mobile trace organic contaminants in surface waters	Analytical and Bioanalytical Chemistry	10.1007/s00216-020-02653-1	x		x		x												x
Sherman, A; Hämmerle, LE; Mordechay, EB; Chefetz, B; Hüffer, T; Hofmann, T	2024	Uptake of tire-derived compounds in leafy vegetables and implications for human dietary exposure	Frontiers in Environmental Science	10.3389/fenvs.2024.1384506						x			x								x
Shin, H; Jeong, S; Hong, J; Wi, E; Park, E; Yang, SI; Kwon, JT; Lee, H; Lee, J; Kim, Y	2023	Rapid generation of aged tire-wear particles using dry-, wet-, and cryo-milling for ecotoxicity testing	0	10.1016/j.envpol.2023.121787	x	x															x
Shukla, SP; Sageer, S; Singh, D; Markandeya	2023	A GIS based vehicular emission inventory including fugitive dust emissions of Lucknow city, India	Environment, Development and Sustainability	10.1007/s10668-023-03704-0	x		x	x	x	x				x							x
Sibeko, MA; Adeniji, AO; Okoh, OO; Hlangothi, SP	2020	Trends in the management of waste tyres and recent experimental approaches in the analysis of polycyclic aromatic hydrocarbons (PAHs) from rubber crumbs	Environmental Science and Pollution Research	10.1007/s11356-020-09703-2						x				x		x						x
Sieber, R; Kawecki, D; Nowack, B	2020	Dynamic probabilistic material flow analysis of rubber release from tires into the environment	Environmental Pollution	10.1016/j.envpol.2019.113573	x				x													x
Siegfried M, Koelmans AA, Besseling E, Kroeze C.	2017	Export of microplastics from land to sea. A modelling approach	Water Research	10.1016/j.watres.2017.10.011	x				x													x
Simon, M; Hartmann, NB; Vollertsen, J	2021	Accelerated Weathering Increases the Release of Toxic Leachates from Microplastic Particles as Demonstrated through Altered Toxicity to the Green Algae Raphidocelis subcapitata	Toxics	10.3390/toxics9080185						x		x									x
Simons, A	2016	Road transport: new life cycle inventories for fossil-fuelled passenger cars and non-exhaust emissions in ecoinvent v3	The International Journal of Life Cycle Assessment	10.1007/s11367-013-0642-9	x		x	x														x
Singer, G; Overko, R; Yilmaz, S; Crisostomi, E; Shorten, R	2021	Markovian city-scale modelling and mitigation of micro-particles from tires	PLOS ONE	10.1371/journal.pone.0260226	x			x												x		x
Sjödin, Å; Ferm, M; Björk, A; Rahmberg, M	2010	Wear particles from road traffic-a field, laboratory and modelling study. Final report		10.13140/RG.2.2.18594.35524	x		x														x
Skuland, T; Grytting, VS; Låg, M; Jorgensen, RB; Snilsberg, B; Leseman, DLAC; Kubátová, A; Emond, J; Cassee, FR; Holme, JA; Ovrevik, J; Refsnes, M	2022	Road tunnel-derived coarse, fine and ultrafine particulate matter: physical and chemical characterization and pro-inflammatory responses in human bronchial epithelial cells	Particle and Fibre Toxicology	10.1186/s12989-022-00488-5	x		x		x												x
Sommer, F; Dietze, V; Baum, A; Sauer, J; Gilge, S; Maschowski, C; Gieré, R	2018	Tire Abrasion as a Major Source of Microplastics in the Environment	Aerosol and Air Quality Research	10.4209/aaqr.2018.03.0099	x	x	x														x
Son, CE; Choi, SS	2022	Preparation and Characterization of Model Tire-Road Wear Particles	Polymers	10.3390/polym14081512	x	x	x	x													x
Son, CE; Chol, SS	2021	Analytical Method for Determination of the Content of Tire Wear Particle in Tire and Road Wear Particles	ELASTOMERS AND COMPOSITES	10.7473/ec.2021.56.1.1	x	x															x
Spanheimer, V; Katrakova-Krüger, D	2022	Analysis of tire wear airstrip particles (TWAP)	Scientific Reports	10.1038/s41598-022-19986-9	x	x	x			x	x										x
Spies, R; Andresen, B; Rice Jr, D	1987	Benzthiazoles in estuarine sediments as indicators of street runoff	Nature	10.1038/327697a0						x											x
Srimuruganandam, B; Nagendra, SMS	2012	Application of positive matrix factorization in characterization of PM10 and PM2.5 emission sources at urban roadside	Chemosphere	10.1016/j.chemosphere.2012.02.083	x	x	x												x		x
Stack, ME; Hollman, K; Mladenov, N; Harper, B; Pinongcos, F; Sant, KE; Rochman, CM; Richardot, W; Dodder, NG; Hoh, E	2023	Micron-size tire tread particles leach organic compounds at higher rates than centimeter-size particles: Compound identification and profile comparison	Environmental Pollution	10.1016/j.envpol.2023.122116						x	x	x	x								x
Sundt, P., Schultze, P.-E., Syversen, F	2014	Sources of microplastic- pollution to the marine environment	Norwegian Environment Agency		x																	x
Sturtz, TM; Adar, SD; Gould, T; Larson, TV	2014	Constrained source apportionment of coarse particulate matter and selected trace elements in three cities from the multi-ethnic study of atherosclerosis	Atmospheric Environment	10.1016/j.atmosenv.2013.11.031	x					x											x
Sutschet, A; Bause, K; Bischofberger, A; Ott, S	2023	Particulate matter emissions from dry-running friction systems in vehicles	Forschung im Ingenieurwesen	10.1007/s10010-023-00664-9	x	x	x	x														x
Swietlik, R; Trojanowska, M; Strzelecka, M; Bocho-Janiszewska, A	2015	Fractionation and mobility of Cu, Fe, Mn, Pb and Zn in the road dust retained on noise barriers along expressway - A potential tool for determining the effects of driving conditions on speciation of emitted particulate metals	Environmental Pollution	10.1016/j.envpol.2014.10.018	x			x													x
Taghvaee, S; Sowlat, MH; Mousavi, A; Hassanvand, MS; Yunesian, M; Naddafi, K; Sioutas, C	2018	Source apportionment of ambient PM2.5 in two locations in central Tehran using the Positive Matrix Factorization (PMF) model	Science of The Total Environment	10.1016/j.scitotenv.2018.02.096	x		x		x												x
Tang, T; Kolodziej, EP	2022	Sorption and Desorption of Tire Rubber and Roadway-Derived Organic Contaminants in Soils and a Representative Engineered Geomedium	ACS ES&T water	10.1021/acsestwater.2c00380						x											x
Tang, Y; Sun, SQ; Zhang, LY; Du, ZX; Zhuang, JC; Pan, JH	2018	Determination of 16 polycyclic aromatic hydrocarbons in tire rubber by ultra-high performance supercritical fluid chromatography combined with atmospheric pressure photoionization-tandem mass spectrometry	ANALYTICAL METHODS	10.1039/c8ay01580e						x	x										x
Thapalia A, Borrok DM, Van Metre PC, Musgrove M, Landa ER.	2010	Zn and Cu isotopes as tracers of anthropogenic contamination in a sediment core from an urban lake	Environmental Science & Technology	10.1021/es902933y						x			x								x
Thapalia A, Borrok DM, Van Metre PC, Wilson J.	2015	Zinc isotopic signatures in eight lake sediment cores from across the United States	Environmental Science & Technology	10.1021/es5036893						x			x								x
Thaptong, P; Sae-oui, P; Sirisinha, C	2017	INFLUENCES OF STYRENE BUTADIENE RUBBER AND SILICA TYPES ON PERFORMANCE OF PASSENGER CAR RADIAL TIRE TREAD	RUBBER CHEMISTRY AND TECHNOLOGY	10.5254/rct.17.83724	x			x													x
Thomas J, Moosavian SK, Cutright T, Pugh C, Soucek MD.	2022	Method Development for Separation and Analysis of Tire and Road Wear Particles from Roadside Soil Samples	Environmental Science & Technology	10.1021/acs.est.2c03695	x	x															x
Thomas, J; Cutright, T; Pugh, C; Soucek, MD	2022	Quantitative assessment of additive leachates in abiotic weathered tire cryogrinds and its application to tire wear particles in roadside soil samples	Chemosphere	10.1016/j.chemosphere.2022.137132	x		x			x											x
Thomas, J; Moosavian, SK; Cutright, T; Pugh, C; Soucek, MD	2021	Investigation of abiotic degradation of tire cryogrinds	Polymer Degradation and Stability	10.1016/j.polymdegradstab.2021.109814						x	x	x	x								x
Thomas, J; Patil, R	2023	The Road to Sustainable Tire Materials: Current State-of-the-Art and Future Prospectives	ENVIRONMENTAL SCIENCE & TECHNOLOGY	10.1021/acs.est.2c07642	x		x															x
Tian, Z; Zhao, H; Peter, K T; Gonzalez, M; Wetzel, J; Wu, C; Hu, X; Prat, J; Mudrock, E; Hettinger, R; Cortina, AE; Biswas, RG; Kock, FVC; Soong, R; Jenne, A; Du, B; Hou, F; He, H; Lundeen, R; Gilbreath, A; Sutton, R; Scholz, NL; Davis, JW; Dodd, MC; Simpson, A; McIntyre, JK; Kolodziej, EP	2021	A ubiquitous tire rubber–derived chemical induces acute mortality in coho salmon	Science	10.1126/science.abd6951						x		x									x
Tian, ZX; Dietze, V; Sommer, F; Baum, A; Kaminski, U; Sauer, J; Maschowski, C; Stille, P; Cen, K; Gieré, R	2017	Coarse-Particle Passive-Sampler Measurements and Single-Particle Analysis by Transmitted Light Microscopy at Highly Frequented Motorways	Aerosol and Air Quality Research	10.4209/aaqr.2017.02.0064	x		x												x		x
Timmers, VRJH; Achten, PAJ	2016	Non-exhaust PM emissions from electric vehicles	Atmospheric Environment	10.1016/j.atmosenv.2016.03.017	x			x														x
Todoroff, V; Paupy, S; Biesse, F; Le Chenadec, Y	2019	The mechanisms involved during the wet braking of new and worn tires	Vehicle System Dynamics	10.1080/00423114.2018.1535126	x			x													x
Tonegawa, Y; Sasaki, S	2021	Development of Tire-Wear Particle Emission Measurements for Passenger Vehicles	Emission Control Science and Technology	10.1007/s40825-020-00181-z	x	x	x	x	x												x
Tumwet, FC; Fester, K; Vrchovecká, S; Scheytt, T	2025	Characterisation of tire wear particles and their chemical markers: A case study along a German highway	Case Studies in Chemical and Environmental Engineering	10.1016/j.cscee.2025.101163	x	x	x			x	x	x									x
Trudsø LL, Nielsen MB, Hansen SF, Syberg K, Kampmann K, Khan FR, Palmqvist A.	2022	The need for environmental regulation of tires: Challenges and recommendations	Environmental Pollution	10.1016/j.envpol.2022.119974	x				x													x
Unice KM, Kreider ML, Panko JM.	2013	Comparison of tire and road wear particle concentrations in sediment for watersheds in France, Japan, and the United States by quantitative pyrolysis GC/MS analysis	Environmental Science & Technology	10.1021/es400871j	x	x			x												x
Unice, KM; Bare, JL; Kreider, ML; Panko, JM	2015	Experimental methodology for assessing the environmental fate of organic chemicals in polymer matrices using column leaching studies and OECD 308 water/sediment systems: Application to tire and road wear particles	Science of The Total Environment	10.1016/j.scitotenv.2015.06.053						x		x	x								x
Unice, KM; Kreider, ML; Panko, JM	2012	Use of a Deuterated Internal Standard with Pyrolysis-GC/MS Dimeric Marker Analysis to Quantify Tire Tread Particles in the Environment	International Journal of Environmental Research and Public Health	10.3390/ijerph9114033	x	x															x
Unice, KM; Weeber, MP; Abramson, MM; Reid, RCD; van Gils, JAG; Markus, AA; Vethaak, AD; Panko, JM	2019	Characterizing export of land-based microplastics to the estuary - Part I: Application of integrated geospatial microplastic transport models to assess tire and road wear particles in the Seine watershed	Science of The Total Environment	10.1016/j.scitotenv.2018.07.368	x				x												x
Unice, KM; Weeber, MP; Abramson, MM; Reid, RCD; van Gils, JAG; Markus, AA; Vethaak, AD; Panko, JM	2019	Characterizing export of land-based microplastics to the estuary - Part II: Sensitivity analysis of an integrated geospatial microplastic transport modeling assessment of tire and road wear particles	Science of The Total Environment	10.1016/j.scitotenv.2018.08.301	x				x												x
Urrutia-Goyes R, Hernandez N, Carrillo-Gamboa O, Nigam KDP, Ornelas-Soto N.	2018	Street dust from a heavily-populated and industrialized city: Evaluation of spatial distribution, origins, pollution, ecological risks and human health repercussions	Ecotoxicology and Environmental Safety	10.1016/j.ecoenv.2018.04.054	x		x		x												x
Vallabani, NVS; Gruzieva, O; Elihn, K; Juárez-Facio, AT; Steimer, SS; Kuhn, J; Silvergren, S; Portugal, J; Piña, B; Olofsson, U; Johansson, C; Karlsson, HL	2023	Toxicity and health effects of ultrafine particles: Towards an understanding of the relative impacts of different transport modes	Environmental Research	10.1016/j.envres.2023.116186	x				x	x												x
Valotto, G; Squizzato, S; Masiol, M; Zannoni, D; Visin, F; Rampazzo, G	2014	Elemental characterization, sources and wind dependence of PM1 near Venice, Italy	Atmospheric Research	10.1016/j.atmosres.2014.03.007	x		x														x
Valotto, G; Zannoni, D; Guerriero, P; Rampazzo, G; Visin, F	2019	Characterization of road dust and resuspended particles close to a busy road of Venice mainland (Italy)	International Journal of Environmental Science and Technology	10.1007/s13762-019-02246-1	x	x	x			x	x										x
Valotto, G; Zannoni, D; Rampazzo, G; Visin, F; Formenton, G; Gasparello, A	2018	Characterization and preliminary risk assessment of road dust collected in Venice airport (Italy)	Journal of Geochemical Exploration	10.1016/j.gexplo.2018.03.005						x											x
van Broekhuizen, P; Saeaemaenen, A; Schuurbiers, D; Isigonis, P; Jensen, K; Kuehnel, D; Le Blansch, K	2022	Tyre wear nanoparticles as test for a nano risk governance framework	Frontiers in Environmental Science	10.3389/fenvs.2022.1045246	x			x	x												x
van der Gon, HACD; Gerlofs-Nijland, ME; Gehrig, R; Gustafsson, M; Janssen, N; Harrison, RM; Hulskotte, J; Johansson, C; Jozwicka, M; Keuken, M; Krijgsheld, K; Ntziachristos, L; Riediker, M; Cassee, FR	2013	The Policy Relevance of Wear Emissions from Road Transport, Now and in the FutureAn International Workshop Report and Consensus Statement	Journal of The Air & Waste Management Association	10.1080/10962247.2012.741055	x				x													x
Venghaus, D; Neupert, JW; Barjenbruch, M	2023	Tire Wear Monitoring Approach for Hotspot Identification in Road Deposited Sediments from a Metropolitan City in Germany	Sustainability	10.3390/su151512029	x	x	x		x												x
Vercauteren M, Semmouri I, Van Acker E, Pequeur E, Van Esch L, Uljee I, Asselman J, Janssen CR.	2023	Assessment of road run-off and domestic wastewater contribution to microplastic pollution in a densely populated area (Flanders, Belgium)	Environmental Pollution	10.1016/j.envpol.2023.122090	x	x	x		x												x
Vouitsis, I; Portugal, J; Kontses, A; Karlsson, HL; Faria, M; Elihn, K; Juárez-Facio, AT; Amato, F; Piña, B; Samaras, Z	2023	Transport-related airborne nanoparticles: Sources, different aerosol modes, and their toxicity	Atmospheric Environment	10.1016/j.atmosenv.2023.119698	x				x	x				x		x						x
Wagner, S; Funk, CW; Müller, K; Raithel, DJ	2024	The chemical composition and sources of road dust, and of tire and road wear particles–A review	Science of the Total Environment	10.1016/j.scitotenv.2024.171694	x				x													x
Wagner, S; Hüffer, T; Klöckner, P; Wehrhahn, M; Hofmann, T; Reemtsma, T	2018	Tire wear particles in the aquatic environment - A review on generation, analysis, occurrence, fate and effects	Water Research	10.1016/j.watres.2018.03.051	x	x	x	x	x	x	x											x
Wagner, S; Klöckner, P; Reemtsma, T	2021	Aging of tire and road wear particles in terrestrial and freshwater environments-A review on processes, testing, analysis and impact	Chemosphere	10.1016/j.chemosphere.2021.132467	x				x	x		x										x
Wang CH, Yan K, Han XY, Shi Z, Bi LM, Xiang F, Ning P, Shi JW.	2017	Physico-chemical Characteristic Analysis of PM(2.5) in the Highway Tunnel in the Plateau City of Kunming	Huan jing ke xue= Huanjing kexue	10.13227/j.hjkx.201702052	x	x	x			x	x										x
Wang Y, Fu R, Sun P, Li X, Zhao W.	2023	Screening eco-friendliness tire antioxidants alternatives: functional 2,2,4-trimethyl-1,2-dihydroquinoline derivatives design and toxicity evaluation	Environ Sci Pollut Res Int	10.1007/s11356-023-28836-8						x											x
Wang, C; Huang, HB; Chen, X; Liu, JP	2017	The influence of the contact features on the tyre wear in steady-state conditions	0	10.1177/0954407016671462	x			x													x
Wang, HM; Hu, WT; Luo, S; Liu, MY; Chen, JR; Chen, QZ; Liu, CD; Pan, L	2023	Size distribution and elemental composition of airborne particulate matter on four plant species in vertical greenery systems	Building and Environment	10.1016/j.buildenv.2023.110888	x		x														x
Wang, HM; Luo, ZX; Yu, RL; Yan, CZ; Zhou, SF; Xing, BS	2023	Tire wear particles: Trends from bibliometric analysis, environmental distribution with meta-analysis, and implications	Environmental Pollution	10.1016/j.envpol.2023.121150	x		x	x	x													x
Wang, KC; Chu, XY; Lin, J; Yang, QL; Fan, ZP; Wang, DW; Oeser, M	2021	Investigation of the Formation Mechanism and Environmental Risk of Tire-Pavement Wearing Waste (TPWW)	Sustainability	10.3390/su13158172	x		x	x													x
Wang, Q; Liu, M; Yu, YP; Du, FF; Wang, X	2014	Black carbon in soils from different land use areas of Shanghai, China: Level, sources and relationship with polycyclic aromatic hydrocarbons	Applied Geochemistry	10.1016/j.apgeochem.2014.04.011						x	x		x								x
Wang, QQ; Qiao, LP; Zhou, M; Zhu, SH; Griffith, S; Li, L; Yu, JZ	2018	Source Apportionment of PM2.5 Using Hourly Measurements of Elemental Tracers and Major Constituents in an Urban Environment: Investigation of Time-Resolution Influence	Journal of Geophysical Research	10.1029/2017jd027877	x		x		x												x
Wang, XL; Gronstal, S; Lopez, B; Jung, H; Chen, LWA; Wu, GY; Ho, SSH; Chow, JC; Watson, JG; Yao, Q; Yoon, S	2022	Evidence of non-tailpipe emission contributions to PM2.5 and PM10 near southern California highways	Environmental Pollution	10.1016/j.envpol.2022.120691	x	x			x												x
Wei, H; Flanagan, K; Lundy, L; Muthanna, TM; Viklander, M	2023	A study of 101 organic substances in gully pot sediments accumulated over a one-year period in Stockholm, Sweden	Science of the Total Environment	10.1016/j.scitotenv.2023.165028						x											x
Wei, LN; Wu, NN; Xu, R; Liu, S; Li, HX; Lin, L; Hou, R; Xu, XR; Zhao, JL; Ying, GG	2024	First Evidence of the Bioaccumulation and Trophic Transfer of Tire Additives and Their Transformation Products in an Estuarine Food Web	Environmental Science and Technology	10.1021/acs.est.3c10248						x			x								x
Weinbruch, S; Worringen, A; Ebert, M; Scheuvens, D; Kandler, K; Pfeffer, U; Bruckmann, P	2014	A quantitative estimation of the exhaust, abrasion and resuspension components of particulate traffic emissions using electron microscopy	Atmospheric Environment	10.1016/j.atmosenv.2014.09.075	x	x	x		x												x
Weyrauch S, Seiwert B, Voll M, Wagner S, Reemtsma T.	2023	Accelerated aging of tire and road wear particles by elevated temperature, artificial sunlight and mechanical stress - A laboratory study on particle properties, extractables and leachables	Science of the Total Environment	10.1016/j.scitotenv.2023.166679						x		x									x
Wi, E; Park, E; Shin, H; Hong, J; Jeong, S; Kwon, J-T; Lee, H-J; Lee, J; Kim, Y	2023	Overall distribution of tire-wear particles, nano‑carbon black, and heavy metals in size-fractionated road dust collected from steel industrial complexes	Science of The Total Environment	10.1016/j.scitotenv.2023.163878	x		x														x
Wiener, EA; LeFevre, GH	2022	White Rot Fungi Produce Novel Tire Wear Compound Metabolites and Reveal Underappreciated Amino Acid Conjugation Pathways	Environmental Science and Technology Letters	10.1021/acs.estlett.2c00114						x			x								x
Williams, RL; Cadle, SH	1978	Characterization of Tire Emissions Using an Indoor Test Facility	Rubber Chemistry and Technology	10.5254/1.3535728	x		x	x						x	x	x	x				x
Woo, SH; Jang, H; Lee, SB; Lee, S	2022	Comparison of total PM emissions emitted from electric and internal combustion engine vehicles: An experimental analysis	Science of The Total Environment	10.1016/j.scitotenv.2022.156961	x		x	x												x	x
Woo, SH; Jang, H; Mun, SH; Lim, Y; Lee, S	2022	Effect of treadwear grade on the generation of tire PM emissions in laboratory and real-world driving conditions	Science of The Total Environment	10.1016/j.scitotenv.2022.156548	x	x		x													x
Wu CC, Chen LH, Wang Z, Bao LJ, Song L, Zeng EY.	2021	Utility of benzothiazoles as markers of tire-derived inputs to estuarine waters assessed by polyethylene sheets	Environmental Pollution	10.1016/j.envpol.2021.118571						x		x	x								x
Wu, S; Wen, Z; Wu, X; Jiang, B; Liu, Y	2024	Emission inventory of heavy metals from on-road vehicles in Xiamen, China, from 2015 to 2060	Atmospheric Pollution Research	10.1016/J.APR.2024.102093	x															x	x
Wu, W; Ma, J; Liu, D; Xu, Q; Li, G	2022	Scientific Knowledge Mapping and Thematic Evolution for Tire Wear Particles	Sustainability	10.3390/su15010583	x		x															x
Xiang, L; Li, YX; Yang, ZF; Shi, JH	2010	Influence of traffic conditions on polycyclic aromatic hydrocarbon abundance in street dust	Journal of Environmental Science and Health Part A	10.1080/10934520903467923						x											x
Xiao, S; Liang, Y; Zhu, X; Kyes, S; Cai, X	2024	Are vehicle tires major contributors to microplastic emissions into the China seas? A simple model perspective	Science of the Total Environment	10.1016/j.scitotenv.2024.171003	x		x														x
Xiong, Y; Tuononen, A	2015	Rolling deformation of truck tires: Measurement and analysis using a tire sensing approach	Journal of Terramechanics	10.1016/j.jterra.2015.07.004	x			x													x
Xu, GL; Xu, JL; Shan, HG; Gao, C; Ran, JS; Ma, YJ; Yao, YH	2022	The influence of the pavement friction coefficient evolution caused by traffic flow on the risk of motorway horizontal curves	PLOS ONE	10.1371/journal.pone.0266519	x			x													x
Xu, Q; Li, G; Fang, L; Sun, Q; Han, RX; Zhu, Z; Zhu, YG	2023	Enhanced Formation of 6PPD-Q during the Aging of Tire Wear Particles in Anaerobic Flooded Soils: The Role of Iron Reduction and Environmentally Persistent Free Radicals	Environmental Science and Technology	10.1021/acs.est.2c08672						x		x	x								x
Yan H, Zhang W, Wang D.	2018	Wheel Force Sensor-Based Techniques for Wear Detection and Analysis of a Special Road	Sensors	10.3390/s18082493	x			x													x
Yan, H; Zhang, LQ; Liu, L; Wen, SP	2020	Investigation of the external conditions and material compositions affecting the formation mechanism and size distribution of tire wear particles	Atmospheric Environment	10.1016/j.atmosenv.2020.118018	x		x	x													x
Yoo, H; Kim, M; Lee, Y; Park, J; Lee, H; Song, YC; Ro, CU	2023	Novel Single-Particle Analytical Technique for Inhalable Airborne Microplastic Particles by the Combined Use of Fluorescence Microscopy, Raman Microspectrometry, and SEM/EDX	Analytical Chemistry	10.1021/acs.analchem.3c00581	x	x															x
Youn, JS; Kim, YM; Siddiqui, MZ; Watanabe, A; Han, S; Jeong, S; Jung, YW; Jeon, KJ	2021	Quantification of tire wear particles in road dust from industrial and residential areas in Seoul, Korea	Science of The Total Environment	10.1016/j.scitotenv.2021.147177	x	x															x
Zahn, D; Mucha, P; Zilles, V; Touffet, A; Gallard, H; Knepper, TP; Frömel, T	2019	Identification of potentially mobile and persistent transformation products of REACH-registered chemicals and their occurrence in surface waters	Water Research	10.1016/j.watres.2018.11.042						x			x								x
Zannoni, D; Valotto, G; Visin, F; Rampazzo, G	2016	Sources and distribution of tracer elements in road dust: The Venice mainland case of study	Journal of Geochemical Exploration	10.1016/j.gexplo.2016.04.007	x		x		x												x
Zeng, L; Li, Y; Sun, Y; Liu, LY; Shen, M; Du, B	2023	Widespread Occurrence and Transport of p-Phenylenediamines and Their Quinones in Sediments across Urban Rivers, Estuaries, Coasts, and Deep-Sea Regions	Environmental Science & Technology	10.1021/acs.est.2c07652						x			x								x
Zhang GT, Yin BH, Bai WY, Guo LY, Wang ZY, Zhang N, Zheng ZS, Zhang LW, Yang W, Han B, Bai ZP.	2022	[Size Distribution and Source Appointment of Road Particles During Winter in Tianjin]	Huan jing ke xue= Huanjing kexue	10.13227/j.hjkx.202112109	x		x	x	x												x
Zhang J, Zhang X, Wu L, Wang T, Zhao J, Zhang Y, Men Z, Mao H.	2018	Occurrence of benzothiazole and its derivates in tire wear, road dust, and roadside soil	Chemosphere	10.1016/j.chemosphere.2018.03.007						x	x	x									x
Zhang Q, Fang T, Men Z, Wei N, Peng J, Du T, Zhang X, Ma Y, Wu L, Mao H.	2024	Direct measurement of brake and tire wear particles based on real-world driving conditions	Science of the Total Environment	10.1016/j.scitotenv.2023.167764	x	x	x														x
Zhang Q, Wang R, Shen Y, Zhan L, Xu Z.	2022	Characteristics of unorganized emissions of microplastics from road fugitive dust in urban mining bases	Science of The Total Environment	10.1016/j.scitotenv.2022.154355	x	x			x												x
Zhang, H-Y; Liu, Y-H; Wei, L-N; Zhu, R-Q; Zhao, J-L; Liu, S; Xu, X-R; Ying, G-G	2024	Unveiling spatiotemporal distribution, partitioning, and transport mechanisms of tire additives and their transformation products in a highly urbanized estuarine region	Science of The Total Environment	10.1016/j.scitotenv.2024.176804						x			x								x
Zhang, J; Hua, P; Krebs, P	2017	The Influence of Surface Pavement on the Distribution of Polycyclic Aromatic Hydrocarbons (PAHs) in Urban Watershed	Water Air and Soil Pollution	10.1007/s11270-017-3501-7	x			x													x
Zhang, J; Li, RF; Zhang, XY; Ding, CF; Hua, P	2019	Traffic contribution to polycyclic aromatic hydrocarbons in road dust: A source apportionment analysis under different antecedent dry-weather periods	Science of The Total Environment	10.1016/j.scitotenv.2018.12.281						x											x
Zhang, JS; Peng, JF; Song, CB; Ma, C; Men, ZY; Wu, JH; Wu, L; Wang, T; Zhang, XF; Tao, SC; Gao, SH; Hopke, PK; Mao, HJ	2020	Vehicular non-exhaust particulate emissions in Chinese megacities: Source profiles, real-world emission factors, and inventories	Environmental Pollution	10.1016/j.envpol.2020.115268	x	x			x												x
Zhang, M., Li, J., Yin, H., Wang, X., Qin, Y., Yang, Z., Wen, Y., Luo, J., Yin, D., Ge, Y., Wang, C., Sun, X., Xu, L	2024	Pilot analysis of tire tread characteristics and associated tire-wear particles in vehicles produced across distinct time periods	Science of the Total Environment	10.1016/J.SCITOTENV.2024.172760	x	x	x														x
Zhang, MZ; Yin, H; Tan, JW; Wang, X; Yang, ZJ; Hao, LJ; Du, TQ; Niu, ZH; Ge, YS	2023	A comprehensive review of tyre wear particles: Formation, measurements, properties, and influencing factors	Atmospheric Environment	10.1016/j.atmosenv.2023.119597	x		x	x	x											x		x
Zhang, QJ; Liu, JY; Wei, N; Song, CB; Peng, JF; Wu, L; Mao, HJ	2022	Identify the contribution of vehicle non-exhaust emissions: a single particle aerosol mass spectrometer test case at typical road environment	Frontiers of Environmental Science &amp; Engineering	10.1007/s11783-023-1662-8	x	x															x
Zhang, SP; Liu, Y; Zhou, HC; Zhang, W; Chen, YX; Zhu, HC	2023	Analysis of the Effect of Wear on Tire Cornering Characteristics Based on Grounding Characteristics	World Electric Vehicle Journal	10.3390/wevj14070166	x			x													x
Zhang, YJ; Xu, TT; Ye, DM; Lin, ZZ; Wang, F; Guo, Y	2022	Widespread N-(1,3-Dimethylbutyl)-N'-phenyl-p-phenylenediamine Quinone in Size-Fractioned Atmospheric Particles and Dust of Different Indoor Environments	Environmental Science and Technology Letters	10.1021/acs.estlett.2c00193	x				x	x		x	x								x
Zhang, ZA; Qin, XR; Zhang, Y	2023	Using Data-Driven Methods and Aging Information to Quantitatively Identify Microplastic Environmental Sources and Establish a Comprehensive Discrimination Index	Environmental Science and Technology	10.1021/acs.est.3c03048	x			x	x													x
Zhang, ZF; Zhang, X; Sverko, E; Marvin, CH; Jobst, KJ; Smyth, SA; Li, YF	2020	Determination of Diphenylamine Antioxidants in Wastewater/Biosolids and Sediment	Environmental Science and Technology Letters	10.1021/acs.estlett.9b00796						x			x								x
Zhao HN, Hu X, Gonzalez M, Rideout CA, Hobby GC, Fisher MF, McCormick CJ, Dodd MC, Kim KE, Tian Z, Kolodziej EP.	2023	Screening p-Phenylenediamine Antioxidants, Their Transformation Products, and Industrial Chemical Additives in Crumb Rubber and Elastomeric Consumer Products	Environmental Science and Technology	10.1021/acs.est.2c07014						x											x
Zhao HN, Hu X, Tian Z, Gonzalez M, Rideout CA, Peter KT, Dodd MC, Kolodziej EP.	2023	Transformation Products of Tire Rubber Antioxidant 6PPD in Heterogeneous Gas-Phase Ozonation: Identification and Environmental Occurrence	Environmental Science and Technology	10.1021/acs.est.2c08690						x		x	x								x
Zhong, C; Sun, J; Zhang, J; Liu, Z; Fang, T; Liang, X; Yin, J; Peng, J; Wu, L; Zhang, Q; Mao, H	2024	Characteristics of Vehicle Tire and Road Wear Particles’ Size Distribution and Influencing Factors Examined via Laboratory Test	Atmosphere	10.3390/atmos15040423	x		x	x													x
Zhou Y, Wang T, Zou M, Yin Q, Jia Z, Su B, Zhang Q, Chen L, Zhou S.	2023	Trends in the occurrence and accumulation of microplastics in urban soil of Nanjing and their policy implications	Sci Total Environ	10.1016/j.scitotenv.2023.166144	x				x												x
Zhou, XY; Luo, ZX; Wang, HM; Luo, YC; Yu, RL; Zhou, SF; Wang, ZH; Hu, GR; Xing, BS	2022	Machine learning application in forecasting tire wear particles emission in China under different potential socioeconomic and climate scenarios with tire microplastics context	Journal of Hazardous Materials	10.1016/j.jhazmat.2022.129878	x			x	x										x	x	x
Zhu, J; Guo, R; Ren, F; Jiang, S; Jin, H	2024	p-Phenylenediamine Derivatives in Tap Water: Implications for Human Exposure	Water	10.3390/w16081128						x			x								x
Ziajahromi, S; Lu, HC; Drapper, D; Hornbuckle, A; Leusch, FDL	2023	Microplastics and Tire Wear Particles in Urban Stormwater: Abundance, Characteristics, and Potential Mitigation Strategies	Environmental Science and Technology	10.1021/acs.est.3c03949	x	x			x												x
Zimnoch, M; Morawski, F; Kuc, T; Samek, L; Bartyzel, J; Gorczyca, Z; Skiba, A; Rozanski, K	2020	Summer-winter contrast in carbon isotope and elemental composition of total suspended particulate matter in the urban atmosphere of Krakow, Southern Poland	Nukleonika	10.2478/nuka-2020-0029	x		x			x									x		x
